# Supplementary material
Source: HighWire-hosted journal article supplement (https://cmajopen.ca/highwire/filestream/87286/field_highwire_adjunct_files/1/2020-0235_Original_submission.pdf)
Supplement: 2020-0235_Original_submission.pdf [file 2020-0235_Original_submission.pdf]

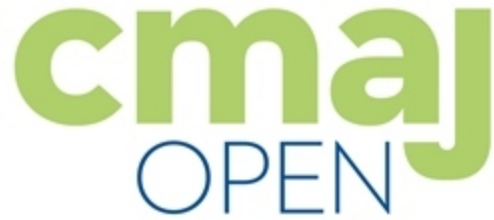

**Does pay-for-performance correlate with better access to primary care? A population-based cross-sectional study of the patient experience in urban Ontario**

|                               |                                                                                                                                                                                                                                                                                                                                                                                                                                                                                                                                                                                                                                                                                                                                                                                                                                                                                                                                                                                                                                                         |
|-------------------------------|---------------------------------------------------------------------------------------------------------------------------------------------------------------------------------------------------------------------------------------------------------------------------------------------------------------------------------------------------------------------------------------------------------------------------------------------------------------------------------------------------------------------------------------------------------------------------------------------------------------------------------------------------------------------------------------------------------------------------------------------------------------------------------------------------------------------------------------------------------------------------------------------------------------------------------------------------------------------------------------------------------------------------------------------------------|
| Journal:                      | <i>CMAJ Open</i>                                                                                                                                                                                                                                                                                                                                                                                                                                                                                                                                                                                                                                                                                                                                                                                                                                                                                                                                                                                                                                        |
| Manuscript ID                 | CMAJOpen-2020-0235                                                                                                                                                                                                                                                                                                                                                                                                                                                                                                                                                                                                                                                                                                                                                                                                                                                                                                                                                                                                                                      |
| Manuscript Type:              | Cross-sectional                                                                                                                                                                                                                                                                                                                                                                                                                                                                                                                                                                                                                                                                                                                                                                                                                                                                                                                                                                                                                                         |
| Date Submitted by the Author: | 25-Sep-2020                                                                                                                                                                                                                                                                                                                                                                                                                                                                                                                                                                                                                                                                                                                                                                                                                                                                                                                                                                                                                                             |
| Complete List of Authors:     | Premji, Kamila; University of Western Ontario, Family Medicine; University of Ottawa, Family Medicine<br>Sucha, Ewa; Institute for Clinical Evaluative Sciences<br>Glazier, Richard; Institute for Clinical Evaluative Sciences, primary Care and Population Health; University of Toronto, Family and Community Medicine; St. Michael's Hospital, Centre for Inner City Health<br>Green, Michael; Queen's University, Family Medicine; Queen's University, Centre for Health Services and Policy Research<br>Wodchis, Walter; University of Toronto, Health Policy, Management, and Evaluation<br>Hogg, William; Bruyere Research Institute, C.T. Lamont Primary Health Care Research Centre; University of Ottawa, Family Medicine<br>Kiran, Tara; St. Michael's Hospital, Department of Family and Community Medicine;<br>Frymire, Eliot; Queen's University, Centre for Health Services and Policy Research<br>Freeman, Thomas; University of Western Ontario, Family medicine<br>Ryan, Bridget; The University of Western Ontario, Family Medicine |
| Keywords:                     | Family medicine, general practice, primary care, Health policy, Health services research                                                                                                                                                                                                                                                                                                                                                                                                                                                                                                                                                                                                                                                                                                                                                                                                                                                                                                                                                                |
| More Detailed Keywords:       | Pay-for-performance, Financial incentives, Access, Evaluation, Patient experience, Physician payment                                                                                                                                                                                                                                                                                                                                                                                                                                                                                                                                                                                                                                                                                                                                                                                                                                                                                                                                                    |
| Abstract:                     | <p><b>BACKGROUND</b><br/>Ontario's primary care pay-for-performance Access Bonus rewards those whose patients seek less external care (e.g., walk-in clinics). In theory, higher bonuses should mean better patient access. However, recent research suggests otherwise; rurality strongly correlates with higher bonuses despite higher emergency department use and fewer primary care services versus urban settings. In the urban context, lower bonuses may reflect the abundance of walk-in clinics. It is unclear if lower bonuses also reflect patients' experiences accessing their primary care.</p> <p><b>METHODS</b><br/>To examine the relationship between the Access Bonus and urban</p>                                                                                                                                                                                                                                                                                                                                                 |

1  
2  
3  
4  
5  
6  
7  
8  
9  
10  
11  
12  
13  
14  
15  
16  
17  
18  
19  
20  
21  
22  
23  
24  
25  
26  
27  
28  
29  
30  
31  
32  
33  
34  
35  
36  
37  
38  
39  
40  
41  
42  
43  
44  
45  
46  
47  
48  
49  
50  
51  
52  
53  
54  
55  
56  
57  
58  
59  
60

|  |                                                                                                                                                                                                                                                                                                                                                                                                                                                                                                                                                                                                                                                                                                                                                                                                                                                                                                                                                                                                                                                                                                                                                                                                                                                |
|--|------------------------------------------------------------------------------------------------------------------------------------------------------------------------------------------------------------------------------------------------------------------------------------------------------------------------------------------------------------------------------------------------------------------------------------------------------------------------------------------------------------------------------------------------------------------------------------------------------------------------------------------------------------------------------------------------------------------------------------------------------------------------------------------------------------------------------------------------------------------------------------------------------------------------------------------------------------------------------------------------------------------------------------------------------------------------------------------------------------------------------------------------------------------------------------------------------------------------------------------------|
|  | <p>patient-reported access in Ontario, we conducted a cross-sectional secondary data analysis of health administrative data linked to a patient experience survey conducted from 2013-17. We stratified the urban geography into Large, Medium, and Small Urban settings.</p> <p><b>RESULTS</b></p> <p>18,893 survey respondents were linked to 3,940 physicians in 414 bonus-eligible practices. Physicians in Small Urban settings had the highest Access Bonuses. Multi-level multivariate regressions found positive correlations between bonus achievement and patient-reported access in Large and Medium Urban settings, but not in the Small Urban setting. Certain patient demographics also correlated with better access, though these relationships were less consistent once the sample was geographically stratified.</p> <p><b>INTERPRETATION</b></p> <p>While the Access Bonus correlated with access in larger urban settings, it did not in smaller settings, aligning with previous research questioning its utility in smaller geographies. There is limited evidence supporting pay-for-performance in health care. The Access Bonus may benefit from a redesign that considers geography and the patient experience.</p> |
|  |                                                                                                                                                                                                                                                                                                                                                                                                                                                                                                                                                                                                                                                                                                                                                                                                                                                                                                                                                                                                                                                                                                                                                                                                                                                |

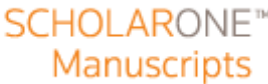

**Premji et al. Does pay-for-performance correlate with better access to primary care? A population-based cross-sectional study of the patient experience in urban Ontario**

STROBE Statement—Checklist of items that should be included in reports of *cross-sectional studies*

|                              | Item No | Recommendation                                                                                                                                                                                    | Page No    |
|------------------------------|---------|---------------------------------------------------------------------------------------------------------------------------------------------------------------------------------------------------|------------|
| <b>Title and abstract</b>    | 1       | (a) Indicate the study's design with a commonly used term in the title or the abstract                                                                                                            | 1          |
|                              |         | (b) Provide in the abstract an informative and balanced summary of what was done and what was found                                                                                               | 3          |
| <b>Introduction</b>          |         |                                                                                                                                                                                                   |            |
| Background/rationale         | 2       | Explain the scientific background and rationale for the investigation being reported                                                                                                              | 5          |
| Objectives                   | 3       | State specific objectives, including any prespecified hypotheses                                                                                                                                  | 6          |
| <b>Methods</b>               |         |                                                                                                                                                                                                   |            |
| Study design                 | 4       | Present key elements of study design early in the paper                                                                                                                                           | 7          |
| Setting                      | 5       | Describe the setting, locations, and relevant dates, including periods of recruitment, exposure, follow-up, and data collection                                                                   | 7          |
| Participants                 | 6       | (a) Give the eligibility criteria, and the sources and methods of selection of participants                                                                                                       | 8          |
| Variables                    | 7       | Clearly define all outcomes, exposures, predictors, potential confounders, and effect modifiers. Give diagnostic criteria, if applicable                                                          | 8          |
| Data sources/<br>measurement | 8*      | For each variable of interest, give sources of data and details of methods of assessment (measurement). Describe comparability of assessment methods if there is more than one group              | 7          |
| Bias                         | 9       | Describe any efforts to address potential sources of bias                                                                                                                                         | 10         |
| Study size                   | 10      | Explain how the study size was arrived at                                                                                                                                                         | 8          |
| Quantitative variables       | 11      | Explain how quantitative variables were handled in the analyses. If applicable, describe which groupings were chosen and why                                                                      | 10         |
| Statistical methods          | 12      | (a) Describe all statistical methods, including those used to control for confounding                                                                                                             | 10         |
|                              |         | (b) Describe any methods used to examine subgroups and interactions                                                                                                                               | 10         |
|                              |         | (c) Explain how missing data were addressed                                                                                                                                                       | 8, Table 1 |
|                              |         | (d) If applicable, describe analytical methods taking account of sampling strategy                                                                                                                | n/a        |
|                              |         | (e) Describe any sensitivity analyses                                                                                                                                                             | n/a        |
| <b>Results</b>               |         |                                                                                                                                                                                                   |            |
| Participants                 | 13*     | (a) Report numbers of individuals at each stage of study—eg numbers potentially eligible, examined for eligibility, confirmed eligible, included in the study, completing follow-up, and analysed | Figure 1   |
|                              |         | (b) Give reasons for non-participation at each stage                                                                                                                                              | Figure 1   |
|                              |         | (c) Consider use of a flow diagram                                                                                                                                                                | Figure 1   |
| Descriptive data             | 14*     | (a) Give characteristics of study participants (eg demographic, clinical, social) and information on exposures and potential confounders                                                          | Tables 2-4 |

|                          |     |                                                                                                                                                                                                              |                                       |
|--------------------------|-----|--------------------------------------------------------------------------------------------------------------------------------------------------------------------------------------------------------------|---------------------------------------|
|                          |     | (b) Indicate number of participants with missing data for each variable of interest                                                                                                                          | Tables 2-4                            |
| Outcome data             | 15* | Report numbers of outcome events or summary measures                                                                                                                                                         | Table 1                               |
| Main results             | 16  | (a) Give unadjusted estimates and, if applicable, confounder-adjusted estimates and their precision (eg, 95% confidence interval). Make clear which confounders were adjusted for and why they were included | Figure 3a-d, Figure 4a-d, Tables 5a-d |
|                          |     | (b) Report category boundaries when continuous variables were categorized                                                                                                                                    | Tables 3, 4                           |
|                          |     | (c) If relevant, consider translating estimates of relative risk into absolute risk for a meaningful time period                                                                                             | n/a                                   |
| Other analyses           | 17  | Report other analyses done—eg analyses of subgroups and interactions, and sensitivity analyses                                                                                                               | n/a                                   |
| <b>Discussion</b>        |     |                                                                                                                                                                                                              |                                       |
| Key results              | 18  | Summarise key results with reference to study objectives                                                                                                                                                     | 12                                    |
| Limitations              | 19  | Discuss limitations of the study, taking into account sources of potential bias or imprecision. Discuss both direction and magnitude of any potential bias                                                   | 14                                    |
| Interpretation           | 20  | Give a cautious overall interpretation of results considering objectives, limitations, multiplicity of analyses, results from similar studies, and other relevant evidence                                   | 14                                    |
| Generalisability         | 21  | Discuss the generalisability (external validity) of the study results                                                                                                                                        | 14                                    |
| <b>Other information</b> |     |                                                                                                                                                                                                              |                                       |
| Funding                  | 22  | Give the source of funding and the role of the funders for the present study and, if applicable, for the original study on which the present article is based                                                | 2                                     |

\*Give information separately for exposed and unexposed groups.

**Note:** An Explanation and Elaboration article discusses each checklist item and gives methodological background and published examples of transparent reporting. The STROBE checklist is best used in conjunction with this article (freely available on the Web sites of PLoS Medicine at <http://www.plosmedicine.org/>, Annals of Internal Medicine at <http://www.annals.org/>, and Epidemiology at <http://www.epidem.com/>). Information on the STROBE Initiative is available at [www.strobe-statement.org](http://www.strobe-statement.org).

1  
2  
3 **Title: Does pay-for-performance correlate with better access to primary care? A population-**  
4 **based cross-sectional study of the patient experience in urban Ontario**  
5

6 Kamila Premji<sup>1,2</sup> MD, PhD(c) – corresponding author, kpremji@uwo.ca  
7

8 Ewa Sucha<sup>3</sup> PhD  
9

10 Richard H Glazier<sup>4,5</sup> MD, MPH  
11

12 Michael E Green<sup>6,7</sup> MD, MPH  
13

14 Walter P Wodchis<sup>8,9</sup> PhD, MAE  
15

16 William E Hogg<sup>10,11</sup> MD, MSc  
17

18 Tara Kiran<sup>4,5</sup> MD, MSc  
19

20 Eliot Frymire<sup>7</sup> MA  
21

22 Thomas R Freeman<sup>1</sup> MD, MCISc  
23

24 Bridget L Ryan<sup>1,12</sup> PhD  
25  
26  
27

28 <sup>1</sup> Department of Family Medicine, Schulich School of Medicine, University of Western Ontario,  
29 London, Ontario  
30

31 <sup>2</sup> Department of Family Medicine, University of Ottawa, Ottawa, Ontario  
32

33 <sup>3</sup> ICES uOttawa, Ottawa Hospital Research Institute, Ottawa, Ontario  
34

35 <sup>4</sup> Department of Family and Community Medicine and the Centre for Urban Health Solutions  
36 in the Li Ka Shing Knowledge Institute, St. Michael's Hospital, Toronto, Ontario  
37

38 <sup>5</sup> Department of Family and Community Medicine, Faculty of Medicine, University of  
39 Toronto, Toronto, Ontario  
40

41 <sup>6</sup> Institute for Clinical Evaluative Sciences, Kingston, Ontario  
42

43 <sup>7</sup> Centre for Health Services and Policy Research, Queens University, Kingston, Ontario  
44

45 <sup>8</sup> ICES, Toronto, Ontario  
46

47 <sup>9</sup> Institute of Health Policy, Management and Evaluation, University of Toronto, Toronto,  
48 Ontario  
49

50 <sup>10</sup> Institut du Savoir Montfort, Ottawa, Ontario  
51

52 <sup>11</sup> C.T. Lamont Primary Health Care Research Centre  
53

54 <sup>12</sup> Department of Epidemiology and Biostatistics at Western University  
55  
56  
57

1  
2  
3 **Word count: 2498**

4  
5 **Number of Tables: 5**

6  
7 **Number of Figures: 4**

8  
9 **Author contributions**

10  
11 KP conceived the study. KP, ES, BR, RG, MG, WW, WH, TK contributed to the study design. ES  
12 conducted the analysis. All authors interpreted the data. KP drafted the manuscript and all  
13 authors critically reviewed it. All authors read and approved the final manuscript.

14  
15  
16 **Funding**

17  
18 Funding for this study was received from the Physicians Services Incorporated (PSI) Research  
19 Trainee Fellowship (KP), and from the INSPIRE-PHC2 study, which is funded by the Ontario  
20 Ministry of Health and the Ontario Ministry of Long-term Care.

21  
22 **Data Sharing**

23  
24 The dataset from this study is held securely in coded form at ICES. While data sharing  
25 agreements prohibit ICES from making the dataset publicly available, access may be granted to  
26 those who meet pre-specified criteria for confidential access, available at [www.ices.on.ca/DAS](http://www.ices.on.ca/DAS).  
27 The full dataset creation plan and underlying analytic code are available from the authors upon  
28 request, understanding that the computer programs may rely upon coding templates or macros  
29 that are unique to ICES and are therefore either inaccessible or may require modification.

30  
31  
32  
33 **Funding**

34  
35 This study was supported by ICES, which is funded by an annual grant from the Ontario Ministry  
36 of Health and Long-Term Care (MOHLTC). The analyses, conclusions, opinions and statements  
37 expressed herein are solely those of the authors and do not reflect those of the funding or data  
38 sources; no endorsement is intended or should be inferred.

## ABSTRACT

### BACKGROUND

Ontario's primary care pay-for-performance Access Bonus rewards those whose patients seek less external care (e.g., walk-in clinics). In theory, higher bonuses should mean better patient access. However, recent research suggests otherwise; rurality strongly correlates with higher bonuses despite higher emergency department use and fewer primary care services versus urban settings. In the urban context, lower bonuses may reflect the abundance of walk-in clinics. It is unclear if lower bonuses also reflect patients' experiences accessing their primary care.

### METHODS

To examine the relationship between the Access Bonus and urban patient-reported access in Ontario, we conducted a cross-sectional secondary data analysis of health administrative data linked to a patient experience survey conducted from 2013-17. We stratified the urban geography into Large, Medium, and Small Urban settings.

### RESULTS

18,893 survey respondents were linked to 3,940 physicians in 414 bonus-eligible practices. Physicians in Small Urban settings had the highest Access Bonuses. Multi-level multivariate regressions found positive correlations between bonus achievement and patient-reported access in Large and Medium Urban settings, but not in the Small Urban setting. Certain patient

1  
2  
3 demographics also correlated with better access, though these relationships were less  
4  
5  
6 consistent once the sample was geographically stratified.  
7

8  
9 **INTERPRETATION**

10  
11 While the Access Bonus correlated with access in larger urban settings, it did not in smaller  
12  
13 settings, aligning with previous research questioning its utility in smaller geographies. There is  
14  
15 limited evidence supporting pay-for-performance in health care. The Access Bonus may benefit  
16  
17 from a redesign that considers geography and the patient experience.  
18  
19  
20  
21  
22  
23  
24  
25  
26  
27  
28  
29  
30  
31  
32  
33  
34  
35  
36  
37  
38  
39  
40  
41  
42  
43  
44  
45  
46  
47  
48  
49  
50  
51  
52  
53  
54  
55  
56  
57  
58  
59  
60

Confidential



## INTRODUCTION

In the early 2000s, one in five patients in Ontario could not find a family doctor.(1) Canadians were experiencing significant challenges accessing primary care for multiple reasons, including financial recessions that had negatively impacted healthcare funding,(2) provincial policies that reduced the net inflow of physicians,(3–5) and family medicine’s declining appeal to graduating medical students.(6,7) To address the problem, Ontario was among a number of provinces that implemented aggressive and targeted primary care reforms aimed at improving patient access, quality and continuity, satisfaction, and cost-effectiveness.(8–10) To achieve these objectives, Ontario adopted several strategies including a shift from a strictly fee-for-service payment model to a blended capitation model; a shift from solo/small group practices to larger, shared-care team-based models; and funding to adopt electronic medical records.(9) Financial incentives, several of which targeted access, were also introduced, and included in 2004 a pay-for-performance (P4P) incentive called the Access Bonus.

Across Canada and globally, many health systems are adopting P4P models in an effort to shift from quantity-based funding to quality-based funding. The concept of P4P, however, is controversial for many reasons. The dimensions of healthcare quality can be difficult to disaggregate and measure.(11) Financial incentives may be unnecessary among health professionals, who already have high intrinsic motivation to provide high quality service.(12,13) There is concern about creating unintended, negative consequences,(14) such as decreased provider professionalism, reduced intrinsic motivation, increased health inequities, and excessive physician focus on incentivized conditions or behaviours. (15–17) Furthermore, many P4P initiatives have delivered underwhelming results. (18–25)

1  
2  
3 The Ontario Access Bonus is structured with the intention that primary care practices earn  
4 bonuses when their patients do not seek external care (“outside use”) for core primary care  
5 services; the more outside use, the lower the bonus.(26) However, a recent study examining  
6 healthcare utilization found instead that rurality is strongly associated with high bonus  
7 achievement despite higher ED use, higher per capita costs, and delivery of fewer primary care  
8 services when compared to urban settings.(27) In the urban context, lower Access Bonus  
9 achievement appeared to reflect patient choice and the abundance of external sources of care  
10 (e.g., walk-in clinics) rather than accessibility of primary care practices.

11  
12  
13 Studies about P4P have primarily used healthcare utilization data as a proxy measure for  
14 access. However, these data, which do not capture other aspects of access,(28,29) may not  
15 reflect the entire patient experience.(30) Given the importance of the patient experience in  
16 evaluating healthcare quality,(31) there is a need to examine access and the Access Bonus from  
17 the patient’s perspective.

18  
19  
20 This study aimed to examine the relationship between Ontario patients’ reported access to  
21 primary care and the Access Bonus received by their family physicians. We focused specifically  
22 on the urban context, where competition created by walk-in clinics may play a role in the  
23 incentive’s effectiveness.(32) Primary care is recognized as the foundation of any high-  
24 performing healthcare system, and poor access results in poorer health outcomes and higher  
25 health system costs.(33) For policymakers looking to improve primary care access through P4P,  
26 Ontario’s single-payer medicare system, which enables the centralized collection and analysis of  
27 extensive health administrative data, presents a unique opportunity to inform such efforts at a  
28 global level.

## METHODS

### *Setting and context:*

The Access Bonus is available to Ontario family practices that operate within a blended capitation model of care. Within this structure, patients are enrolled to a family physician and most physician earnings come from an annual per-patient payment adjusted for patient age and sex. These models can be team-based or non-team-based, with team-based models receiving additional support from government-funded allied health professionals. The Access Bonus can increase a physician's earnings by up to 18.59% of their capitation payments.

### *Design:*

We undertook a cross-sectional secondary data analysis using data from a patient experience survey linked with Ontario health administrative data.

### *Data sources and linkages:*

We used data from the Health Care Experiences Survey (HCES), a telephone survey conducted quarterly by York University and funded by the Ontario government.<sup>(34)</sup> The HCES asks patients about their experiences with healthcare including primary care access; these questions were used as the outcomes for our study.<sup>(34)</sup> We also used HCES patient-reported data about education, primary language, immigration status, and health status in the analyses.

We obtained health administrative data from ICES, an independent, non-profit research institute whose legal status under Ontario's health information privacy law allows it to collect and analyze health care and demographic data, without consent, for health system evaluation

1  
2  
3 and improvement. Patient-level health administrative data came from the Registered Persons  
4 Database (age, gender) and census data holdings (income quintiles). Physician-level data came  
5  
6 from the ICES Physician Database (age, gender, Canadian graduate, number of years in  
7  
8 practice), the Primary Care Population database (geographic location, roster size (number of  
9  
10 enrolled patients)), and Architected Payment data (Access Bonus achievement). Practice-level  
11  
12 data came from the Primary Care Population database (practice model, group size) and Ontario  
13  
14 Health Insurance Program billings (after-hours services provided).  
15  
16  
17  
18  
19  
20

21 The HCES and ICES datasets were linked using unique encoded identifiers and analyzed at ICES.  
22  
23

24 ***Participants:***  
25  
26

27 A random sample of over 2000 adults (age  $\geq 16$  years) are included in each quarterly wave of  
28  
29 the HCES.(35) Figure 1 reports the participant cohort. Our study population was derived from  
30  
31 HCES participants from 2013-2017. Of those interviewed more than once, we included only the  
32  
33 first interview in our sample. We restricted our sample to those who indicated they had a  
34  
35 regular primary care source and who consented to have their survey data linked to the  
36  
37 provincial health administrative data. These linkages allowed us to link participants to  
38  
39 physician- and practice-level data, including Access Bonus payments. We excluded patients  
40  
41 belonging to practices not in blended capitation models, and therefore ineligible for the Access  
42  
43 Bonus. We also excluded patients from practices that are exempted from providing a minimum  
44  
45 level of weekly after-hours availability. We excluded rural geographies using the Rurality Index  
46  
47 of Ontario (RIO), where rural areas are assigned a score of 40 and above.(36)  
48  
49  
50  
51  
52  
53

54 ***Variable definitions:***  
55  
56  
57  
58  
59  
60

1  
2  
3 Given the diversity of urban Ontario, including diversity in health services delivery, we stratified  
4  
5 our sample into three geographies we labelled as Large Urban (RIO 0), Medium Urban (RIO 1-9),  
6  
7 and Small Urban (RIO 10-39).(36)  
8  
9

### 10 11 Outcomes: 12

13  
14 We measured patients' experiences of access using four access measures from the HCES:  
15  
16 Telephone Access, After-Hours Access, Wait Time for Care ("Wait Time"), and Timeliness of  
17  
18 Wait for Care ("Timeliness"). Table 1 describes the question stems, answer choices, and coding  
19  
20 schemes applied to each outcome variable.  
21  
22

### 23 24 25 Exposure: 26

27  
28 *Access Bonus achievement:* We hypothesized that the Access Bonus would be associated with  
29  
30 patient-reported access as physicians and practices with higher bonus achievement may be  
31  
32 organizing their services to optimize access. The Access Bonus is deposited monthly into the  
33  
34 group's account for distribution and represents a sum of each group member's bonus  
35  
36 attribution. Each member receives a monthly report of their individual attribution and a list of  
37  
38 their patients who sought outside use. Conceptually, both group- and physician-level factors  
39  
40 can influence Access Bonus achievement. At the physician level, differences in individual roster  
41  
42 management may reflect individual responses to the incentive. To account for these within-  
43  
44 group variations, we therefore treated the bonus as a physician-level variable. Access Bonus  
45  
46 achievement was calculated as the proportion of the maximum potential bonus achieved by the  
47  
48 physician in the fiscal year closest to the HCES interview date.  
49  
50  
51  
52  
53  
54  
55  
56  
57  
58  
59  
60

1  
2  
3 Access Bonus achievement was found to follow a non-linear pattern of distribution in our  
4  
5 dataset. We therefore classified the bonus into quintiles based on its distribution and  
6  
7 consistent with other literature.(27) Quintile 1 represented lowest Access Bonus achievement  
8  
9 and Quintile 5 represented highest achievement. Quintile 1 was the reference group in the  
10  
11 analyses.  
12  
13

#### 14 15 16 Covariates: 17

18  
19 Covariates were identified based on previous literature examining factors related to primary  
20  
21 care access.(28,29,37) Patient-level covariates were age, gender, education, primary language,  
22  
23 health status, income quintile, and immigration status. Physician-level covariates were age,  
24  
25 gender, Canadian medical graduate (yes/no), years in practice, and roster size. Practice-level  
26  
27 covariates were group size, practice model, and number of after-hours services provided  
28  
29 annually. Patient ED use, primary care service utilization, and walk-in clinic use were reported  
30  
31 as part of the descriptive analysis. Variables derived from health administrative data (for  
32  
33 example, physician- and practice-level variables), were determined using a lookback period of  
34  
35 12 months prior to the HCES interview date.  
36  
37  
38  
39  
40

#### 41 42 ***Statistical analysis:*** 43

44  
45 We conducted a descriptive analysis of the total sample and the geographically stratified  
46  
47 sample.  
48  
49

50  
51 To examine the relationship between Access Bonus achievement and the four patient-reported  
52  
53 access outcomes, we conducted univariate and multivariate logistic regression analyses for  
54  
55  
56  
57  
58  
59  
60

1  
2  
3 both the total sample and the geographically stratified sample. To account for clustering,  
4  
5  
6 multilevel (patient-, physician-, and practice-level) modelling was used.  
7

8  
9 We used SAS Enterprise Guide version 7.1 (SAS Institute Inc.) for all analyses.  
10

### 11 ***Ethics Approval***

12  
13  
14  
15 The use of data in this project was authorized under section 45 of Ontario's Personal Health  
16  
17 Information Protection Act, which does not require review by a Research Ethics Board.  
18  
19

### 20 **RESULTS**

21  
22  
23 We included 18,893 patients enrolled with 3,940 physicians in 414 practices. Tables 2-4 report  
24  
25  
26 practice, physician, and patient characteristics. Most practices were not team-based models.  
27  
28 Most practices and physicians were in Large Urban settings. The mean physician age was 51.89  
29  
30 years (SD 11.66), and 47.51% of physicians were female. The mean patient age was 53.83 years  
31  
32 (SD 17.05), and 59.69% of patients were female. Most patients were well-educated, spoke  
33  
34 English as their primary language, were non-immigrants, and were in middle income quintiles.  
35  
36 Patients in smaller urban settings had a lower mean number of primary care visits and a higher  
37  
38 number of ED visits in the previous year than those in larger settings. The mean annual number  
39  
40 of after-hours services provided was highest in practices located in Medium Urban settings.  
41  
42  
43 Table 2 includes the main exposure, Access Bonus, by geographic setting. The mean proportion  
44  
45  
46 of maximum potential Access Bonus achieved by physicians in our sample was 40.26% (SD  
47  
48 30.67). This mean was highest in the Small Urban settings and lowest in the Large Urban  
49  
50  
51 settings.  
52  
53  
54  
55  
56  
57  
58  
59  
60

1  
2  
3 Figures 2a-d describe the four patient-reported access outcomes by geography.  
4  
5

6 Our univariate regression analysis found positive relationships between Access Bonus  
7  
8 achievement and each patient-reported access outcome ( $p < 0.05$ , 95% confidence intervals).  
9

10 When stratified by geography, this was most prominent in the largest urban settings. Figures  
11  
12 3a-d summarize these findings.  
13  
14

15  
16 Our multivariate regression analysis also demonstrated positive relationships between Access  
17  
18 Bonus achievement and patient-reported access ( $p < 0.05$ , 95% CI). These are indicated by dark  
19  
20 blue bars in Figures 4a-d. The odds ratios (and 95% CI) for favourable access for the four  
21  
22 outcomes across the total sample were: *Telephone Access* – Q2: 1.18 (0.98-1.42), Q3: 1.34  
23  
24 (1.10-1.63), Q4: 1.46 (1.19-1.79), and Q5: 1.87 (1.50-2.33); *After-Hours Access* – Q2: 1.26 ( 1.09-  
25  
26 1.47), Q3: 1.46 (1.23-1.74), Q4: 1.77 (1.46-2.15), and Q5: 1.88 (1.52-2.32); *Wait Time for Care* –  
27  
28 Q2: 1.01 ( 0.85-1.20), Q3: 1.17 (0.97-1.41), Q4: 1.27 ( 1.05-1.55), and Q5: 1.63 (1.32-2.00); and  
29  
30 *Timeliness* – Q2: 1.29 (0.98-1.69), Q3: 1.29 (0.94-1.77), Q4: 1.58 ( 1.16-2.13), and Q5: 1.98  
31  
32 (1.38-2.82).  
33  
34  
35  
36  
37  
38

39 When stratified by geography, these relationships were again most prominent in the largest  
40  
41 urban settings. A few positive relationships were found in the medium-sized settings, and no  
42  
43 relationships were found in the smallest urban settings.  
44  
45  
46

47 Tables 5a-d report the multivariate regression results for the main exposure along with the  
48  
49 patient-, physician-, and practice-level covariates. ICCs confirm appropriateness of the three-  
50  
51 level modeling for each outcome.  
52  
53  
54

## 55 **INTERPRETATION**

56  
57  
58  
59  
60



1  
2  
3 This study examines the pay-for-performance Access Bonus through the patient experience lens  
4 and with a deeper dive into the complex, competitive urban landscape. We looked at four  
5  
6 patient-reported access measures from the large, multi-year Health Care Experiences Survey,  
7  
8 and stratified urban Ontario into three distinct geographies. We found that the Access Bonus  
9  
10 correlates with better patient-reported access in Large Urban settings and, to some extent, in  
11  
12 Medium Urban settings. Our findings suggest that in the most competitive primary care  
13  
14 markets, such as large cities with numerous walk-in clinics, the Access Bonus may motivate  
15  
16 physicians and practices to organize and deliver services in ways that better meet patients'  
17  
18 needs. As a cross-sectional study, it is also possible that better access was a pre-existing feature  
19  
20 of large urban practices that opted to join the blended capitation model.(38) However, the dose  
21  
22 response seen for three of the four outcomes (i.e., the higher the Access Bonus, the higher the  
23  
24 odds ratio for favourable Telephone Access, After-Hours Access, and Wait Time) provides some  
25  
26 support that the relationship may be causal.  
27  
28  
29  
30  
31  
32  
33  
34

35 These findings contrast with previous Ontario research that measured access using healthcare  
36  
37 utilization and found no correlation between the bonus and patient access.(27) A key reason for  
38  
39 the difference in findings may be the different outcomes used to define access, highlighting the  
40  
41 multidimensional nature of access(28,29,39) and the need for policymakers to depend on more  
42  
43 than one measure. As well, the current study explored the relationship between the Access  
44  
45 Bonus and patient-reported access at different levels of urban geography, and used a different  
46  
47 conceptual approach to calculating the physician bonus to capture within-group variations.  
48  
49  
50  
51  
52

53 In Small Urban settings, we did not see correlations between the Access Bonus and any of the  
54  
55 patient-reported access measures. This suggests that this incentive may not be effective in  
56  
57  
58  
59  
60

1  
2  
3 geographies where competition is minimal and in turn, patient choice limited. This does align  
4  
5 with the conclusion from previous research questioning the utility of the Access Bonus  
6  
7 particularly in smaller settings.(27) In this context, the Access Bonus does not appear to relate  
8  
9 to the access provided to patients.  
10  
11

12  
13 Our multilevel, multivariate regression analysis of the total sample found that certain patient  
14  
15 demographics correlated with access. These included female gender, older age, higher  
16  
17 education, non-immigrant status, and better self-reported health, where correlations with  
18  
19 better access were seen across several measures. Although these relationships were less  
20  
21 consistent when the sample was geographically stratified, they suggest alignment with previous  
22  
23 research reporting that certain patients are more likely to enjoy better access.(28,37) This  
24  
25 reiterates the importance of designing services to meet the needs of more vulnerable  
26  
27 populations.  
28  
29  
30  
31

### 32 33 **Limitations**

34  
35 As a cross-sectional analysis, these results cannot confirm causality. We did not include some  
36  
37 forms of access such as email due to small sample size in the HCES for this question. Changes in  
38  
39 practice necessitated by the COVID-19 pandemic may result in increased use of email and other  
40  
41 forms of virtual care moving forward. Like many surveys, the HCES is susceptible to sampling  
42  
43 bias and recall bias.(37) Finally, the non-linearity of certain covariates such as roster size and  
44  
45 group size mean that regression results for these covariates should be interpreted with caution.  
46  
47  
48  
49  
50

### 51 52 **Conclusion**

53  
54  
55  
56  
57  
58  
59  
60

1  
2  
3 This study adds to existing literature by examining the Access Bonus through a patient  
4  
5 experience lens and within the complex urban context. While the bonus did correlate with  
6  
7 access in larger urban settings, this was not the case in smaller urban settings, aligning with  
8  
9 previous research questioning its utility in smaller geographies. Longitudinal and qualitative  
10  
11 research would help better understand the nature and direction of causal relationships. There  
12  
13 is limited evidence supporting pay-for-performance models in health care. The Access Bonus  
14  
15 incentive may benefit from a redesign that considers geographic factors and the patient  
16  
17  
18  
19  
20  
21  
22  
23  
24  
25  
26  
27  
28  
29  
30  
31  
32  
33  
34  
35  
36  
37  
38  
39  
40  
41  
42  
43  
44  
45  
46  
47  
48  
49  
50  
51  
52  
53  
54  
55  
56  
57  
58  
59  
60

Confidential

## REFERENCES

1. Priest L. Doctor shortage hitting Ontario. *Globe and Mail* [Internet]. 2001 Feb 15; Available from: <https://www.theglobeandmail.com/news/national/doctor-shortage-hitting-ontario/article1030215/>
2. Hutchison B, Levesque J-F, Strumpf E, Coyle N. Primary health care in Canada: systems in motion. *Milbank Q* [Internet]. 2011 Jun [cited 2014 Sep 28];89(2):256–88. Available from: <http://www.pubmedcentral.nih.gov/articlerender.fcgi?artid=3142339&tool=pmcentrez&rendertype=abstract>
3. Stoddart GL, Barer ML. Toward integrated medical resource policies for Canada: 11. Improving effectiveness and efficiency. *Cmaj*. 1992;147(11):1653–60.
4. Chan B. From Perceived Surplus to Perceived Shortage: What Happened to Canada’s Physician Workforce in the 1990s? [Internet]. Ottawa, ON; 2002. Available from: [https://secure.cihi.ca/free\\_products/chanjun02.pdf](https://secure.cihi.ca/free_products/chanjun02.pdf)
5. Freeman TR, Petterson S, Finnegan S, Bazemore A. Shifting tides in the emigration patterns of Canadian physicians to the United States: A cross-sectional secondary data analysis. *BMC Health Serv Res* [Internet]. 2016;16(1):1–8. Available from: <http://dx.doi.org/10.1186/s12913-016-1908-2>
6. Wright B, Scott I, Woloschuk W, Brenneis F, Bradley J. Career choice of new medical students at three Canadian universities: Family medicine versus specialty medicine. *C Can Med Assoc J*. 2004;170(13):1920–4.
7. Malko A, Huckfeldt V. Physician Shortage in Canada: A Review of Contributing Factors. *Glob J Health Sci*. 2017;9(9):68–80.
8. Office of the Auditor General of Ontario. Value-for-money: Physician billing [Internet]. 2016. Available from: [http://www.auditor.on.ca/en/content/annualreports/arreports/en16/v1\\_311en16.pdf](http://www.auditor.on.ca/en/content/annualreports/arreports/en16/v1_311en16.pdf)
9. Sweetman A, Buckley G. Ontario’s Experiment with Primary Care Reform [Internet]. Vol. 7. Calgary, Alberta; 2014. Available from: [www.policyschool.ucalgary.ca/sites/.../ontario-health-care-reform.pdf](http://www.policyschool.ucalgary.ca/sites/.../ontario-health-care-reform.pdf)
10. Kralj B, Kantarevic J. Primary Care in Ontario: Reforms, investments and achievements. *Ont Med Rev*. 2012;(February):18–24.
11. Young RA, Roberts RG, Holden RJ. The Challenges of Measuring, Improving, and Reporting Quality in Primary Care. *Ann Fam Med* [Internet]. 2017;15(2):175–82. Available from: <http://www.ncbi.nlm.nih.gov/pubmed/28289120><http://www.pubmedcentral.nih.gov/articlerender.fcgi?artid=PMC5348238><http://www.annfammed.org/lookup/doi/10.1370/afm.2014>
12. Mooney G, Ryan M. Agency in health care: getting beyond first principles. *J Health Econ*

- [Internet]. 1993 Jul [cited 2014 Sep 30];12(2):125–35. Available from:  
<http://www.ncbi.nlm.nih.gov/pubmed/10127772>
13. Flodgren G, Eccles MP, Shepperd S, Scott A, Parmelli E, Beyer FR. An overview of reviews evaluating the effectiveness of financial incentives in changing healthcare professional behaviours and patient outcomes. (Review). *Cochrane Database Syst Rev.* 2011;(7):1–94.
  14. Doran T, Kontopantelis E, Valderas JM, Campbell S, Roland M, Salisbury C, et al. Effect of financial incentives on incentivised and non-incentivised clinical activities: longitudinal analysis of data from the UK Quality and Outcomes Framework. *BMJ [Internet].* 2011 Jan [cited 2014 Sep 25];342:d3590. Available from:  
<http://www.pubmedcentral.nih.gov/articlerender.fcgi?artid=3125475&tool=pmcentrez&rendertype=abstract>
  15. McDonald R, Harrison S, Checkland K, Campbell SM, Roland M. Impact of financial incentives on clinical autonomy and internal motivation in primary care: ethnographic study. *BMJ [Internet].* 2007 Jun 30 [cited 2014 Aug 29];334(7608):1357. Available from:  
<http://www.pubmedcentral.nih.gov/articlerender.fcgi?artid=1906646&tool=pmcentrez&rendertype=abstract>
  16. Heath I. “The cawing of the crow...Cassandra-like, prognosticating woe”. *Br J Gen Pract [Internet].* 2004 Apr [cited 2014 Sep 30];54(501):320–1. Available from:  
<http://www.pubmedcentral.nih.gov/articlerender.fcgi?artid=1314868&tool=pmcentrez&rendertype=abstract>
  17. Casalino LP, Elster A, Eisenberg A, Lewis E, Montgomery J, Ramos D. Will pay-for-performance and quality reporting affect health care disparities? *Health Aff [Internet].* 2007 [cited 2014 Sep 30];26(3):w405-14. Available from:  
<http://www.ncbi.nlm.nih.gov/pubmed/17426053>
  18. Gosden T, Sibbald B, Williams J, Petchey R, Leese B. Paying doctors by salary: a controlled study of general practitioner behaviour in England. *Health Policy (New York) [Internet].* 2003 Jun [cited 2014 Oct 1];64(3):415–23. Available from:  
<http://www.ncbi.nlm.nih.gov/pubmed/12745177>
  19. Scott A, Sivey P, Ait Ouakrim D, Willenberg L, Naccarella L, Furler J, et al. The effect of financial incentives on the quality of health care provided by primary care physicians ( Review ). *Cochrane Database Syst Rev.* 2011;(9):1–61.
  20. Hurley J, Li J, Decicca P, Buckley G. The Response of Ontario Primary Care Physicians to Pay-for-Performance Incentives Acknowledgments [Internet]. Centre for Health Economics and Policy Analysis. 2011. Available from:  
[http://www.usask.ca/sph/documents/WRTC Info/Seminars/Hurly](http://www.usask.ca/sph/documents/WRTC%20Info/Seminars/Hurly)
  21. Kiran T, Victor JC, Kopp a., Shah BR, Glazier RH. The Relationship Between Financial Incentives and Quality of Diabetes Care in Ontario, Canada. *Diabetes Care [Internet].* 2012 May [cited 2014 Sep 28];35(5):1038–46. Available from:  
<http://www.pubmedcentral.nih.gov/articlerender.fcgi?artid=3329816&tool=pmcentrez&rendertype=abstract>

- rendertype=abstract
22. Kiran T, Wilton AS, Moineddin R, Paszat L, Glazier RH. Effect of payment incentives on cancer screening in Ontario primary care. *Ann Fam Med* [Internet]. 2014 Jul [cited 2014 Sep 17];12(4):317–23. Available from: <http://www.ncbi.nlm.nih.gov/pubmed/25024239>
  23. Campbell S, Reeves D, Kontopantelis E, Sibbald B, Roland M. Effects of Pay for Performance on the Quality of Primary Care in England. *N Engl J Med*. 2009;361:368–78.
  24. Mendelson A, Kondo K, Damberg C, Low A, Motu’apuaka M, Freeman M, et al. The Effects of Pay-for-Performance Programs on Health , Health Care Use, and Processes of Care: A Systematic Review. *Ann Intern Med*. 2017;166(5):341–54.
  25. Minchin M, Roland M, Richardson J, Rowark S, Guthrie B. Quality of Care in the United Kingdom after Removal of Financial Incentives. *N Engl J Med* [Internet]. 2018;379(10):948–57. Available from: <http://www.nejm.org/doi/10.1056/NEJMsa1801495>
  26. Ministry of Health and Long-Term Care of Ontario. Billing & Payment Guide for Family Health Organization ( FHO ) Physicians. 2011.
  27. Glazier RH, Green ME, Frymire E, Kopp A, Hogg W, Premji K, et al. Do incentive payments reward the wrong providers? A study of primary care reform in Ontario, Canada. *Health Aff*. 2019;38(4):624–32.
  28. Premji K, Ryan BL, Hogg WE, Wodchis WP. Patients’ perceptions of access to primary care. *Can Fam Phys*. 2018;64(3):212–20.
  29. Levesque J-F, Harris MF, Russell G. Patient-centred access to health care: conceptualising access at the interface of health systems and populations. *Int J Equity Health* [Internet]. 2013;12(1):18. Available from: <http://equityhealthj.biomedcentral.com/articles/10.1186/1475-9276-12-18>
  30. Goldblatt Partners LLP, Ontario Medical Association. Brief of the OMA Re: Phase 1 - primary care. 2018.
  31. Health Quality Ontario. Ontario Patient Experience Measurement Strategy. Toronto, ON; 2016.
  32. Izenberg D, Buchanan F. In Ontario, do walk-in clinics complement - or complete with - primary care? *Healthy Debate* [Internet]. 2018; Available from: <https://healthydebate.ca/2018/04/topic/ontario-walk-in-clinics>
  33. Starfield B, Shi L, Macinko J. Contribution of primary care to health systems and health. *Milbank Q* [Internet]. 2005 Jan [cited 2014 Sep 18];83(3):457–502. Available from: <http://www.pubmedcentral.nih.gov/articlerender.fcgi?artid=2690145&tool=pmcentrez&rendertype=abstract>
  34. Ontario Ministry of Health, Ministry of Health and Long-Term Care of Ontario. The Health Care Experience Survey [Internet]. 2020 [cited 2020 Aug 16]. p. 1–2. Available from:

1  
2  
3 health.gov.on.ca/en/common/healthcareexperiencesurvey.aspx  
4

- 5 35. Health Analytics Branch of the Ontario Ministry of Health and Long-term Care. Overall  
6 satisfaction with health care in the community: Resource for indicator standards (RIS)  
7 [Internet]. Toronto, ON; 2018. Available from:  
8 [http://www.health.gov.on.ca/en/pro/programs/ris/docs/overall\\_satisfaction\\_healthcare](http://www.health.gov.on.ca/en/pro/programs/ris/docs/overall_satisfaction_healthcare_en.pdf)  
9 [\\_en.pdf](http://www.health.gov.on.ca/en/pro/programs/ris/docs/overall_satisfaction_healthcare_en.pdf)  
10  
11
- 12 36. Kralj B. Measuring 'rurality' for purposes of health-care planning: an empirical measure  
13 for Ontario. Ontario Medical Association Economics Department. 2009.  
14
- 15 37. Kiran T, Green ME, DeWit Y, Khan S, Schultz S, Kopp A, et al. Association of physician  
16 payment model and team-based care with timely access in primary care: a population-  
17 based cross-sectional study. *C Open*. 2020;8(2):E328–37.  
18
- 19 38. Rudoler D, Laporte A, Barnsley J, Glazier RH, Deber RB. Paying for primary care: A cross-  
20 sectional analysis of cost and morbidity distributions across primary care payment  
21 models in Ontario Canada. *Soc Sci Med* [Internet]. 2015;124:18–28. Available from:  
22 <http://dx.doi.org/10.1016/j.socscimed.2014.11.001>  
23  
24
- 25 39. Haggerty J, Burge F, Lévesque J-F, Gass D, Pineault R, Beaulieu M-D, et al. Operational  
26 definitions of attributes of primary health care: consensus among Canadian experts. *Ann*  
27 *Fam Med* [Internet]. 2007 [cited 2014 Sep 30];5(4):336–44. Available from:  
28 [http://www.pubmedcentral.nih.gov/articlerender.fcgi?artid=1934980&tool=pmcentrez&](http://www.pubmedcentral.nih.gov/articlerender.fcgi?artid=1934980&tool=pmcentrez&rendertype=abstract)  
29 [rendertype=abstract](http://www.pubmedcentral.nih.gov/articlerender.fcgi?artid=1934980&tool=pmcentrez&rendertype=abstract)  
30  
31  
32  
33  
34  
35  
36  
37  
38  
39  
40  
41  
42  
43  
44  
45  
46  
47  
48  
49  
50  
51  
52  
53  
54  
55  
56  
57  
58  
59  
60

1  
2  
3  
4  
5  
6  
7  
8  
9  
10  
11  
12  
13  
14  
15  
16  
17  
18  
19  
20  
21  
22  
23  
24  
25  
26  
27  
28  
29  
30  
31  
32  
33  
34  
35  
36  
37  
38  
39  
40  
41  
42  
43  
44  
45  
46  
47  
48  
49  
50  
51  
52  
53  
54  
55  
56  
57  
58  
59  
60

Figure 1. Cohort Flowchart

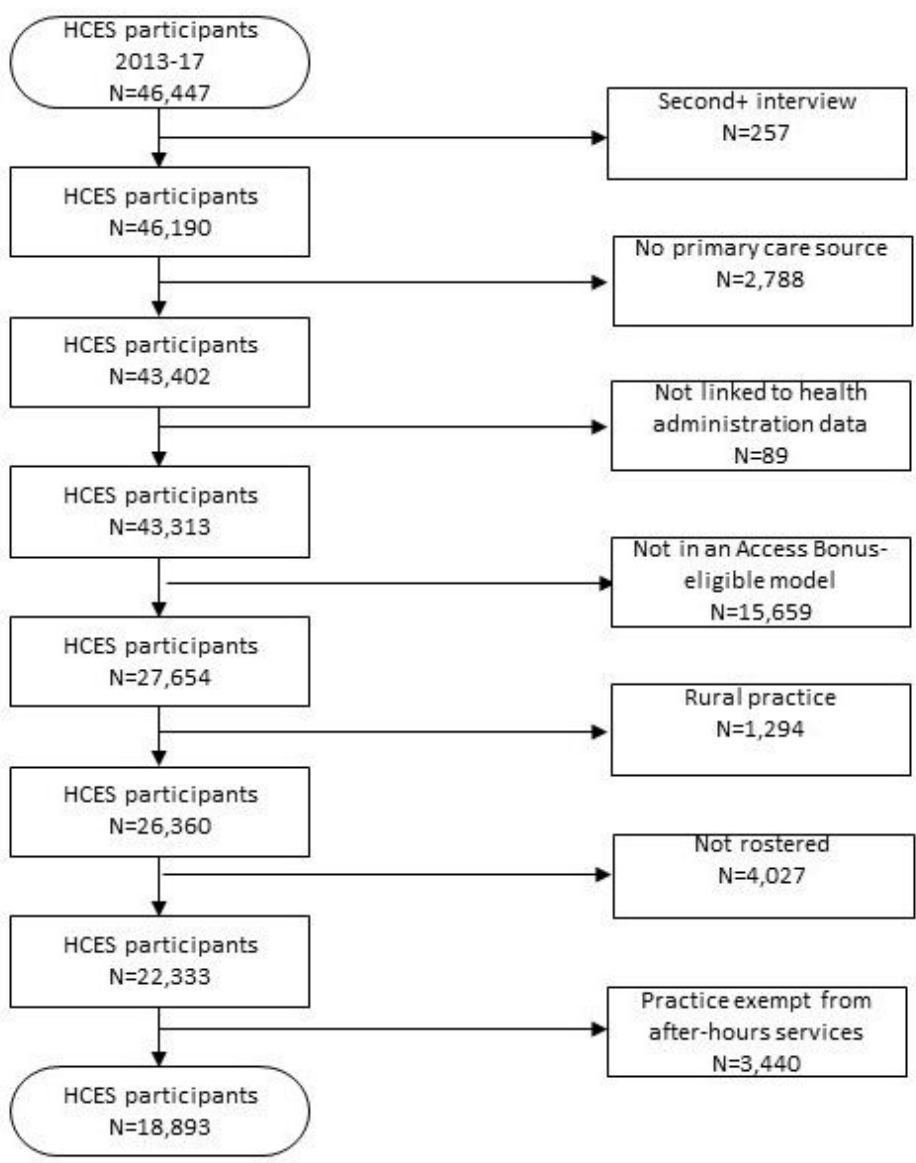



1  
2  
3 **Figure 2. Descriptive Analysis: Patient-Reported Access**  
4

5 Figure 2a. Telephone Access  
6

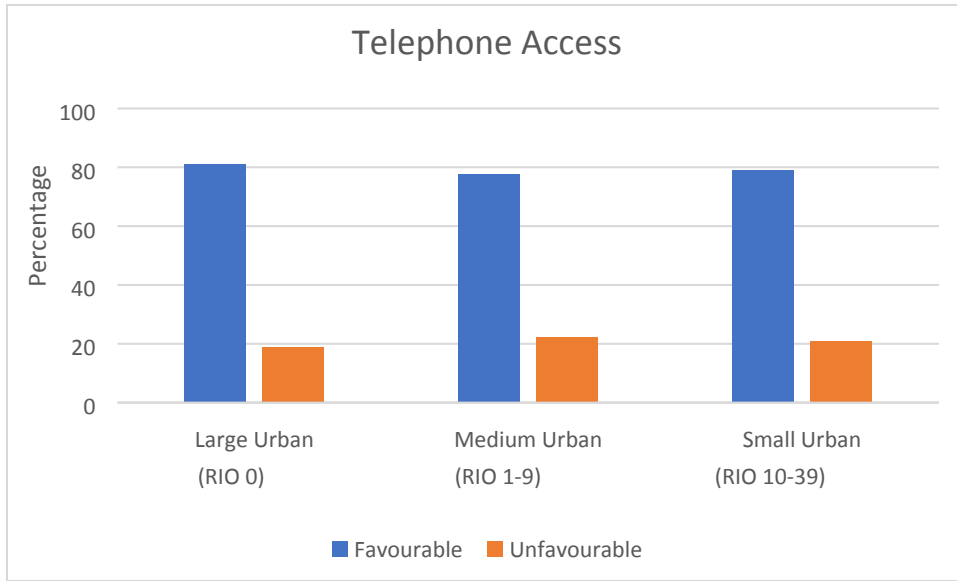

25  
26  
27  
28 Figure 2b. After-Hours Access  
29

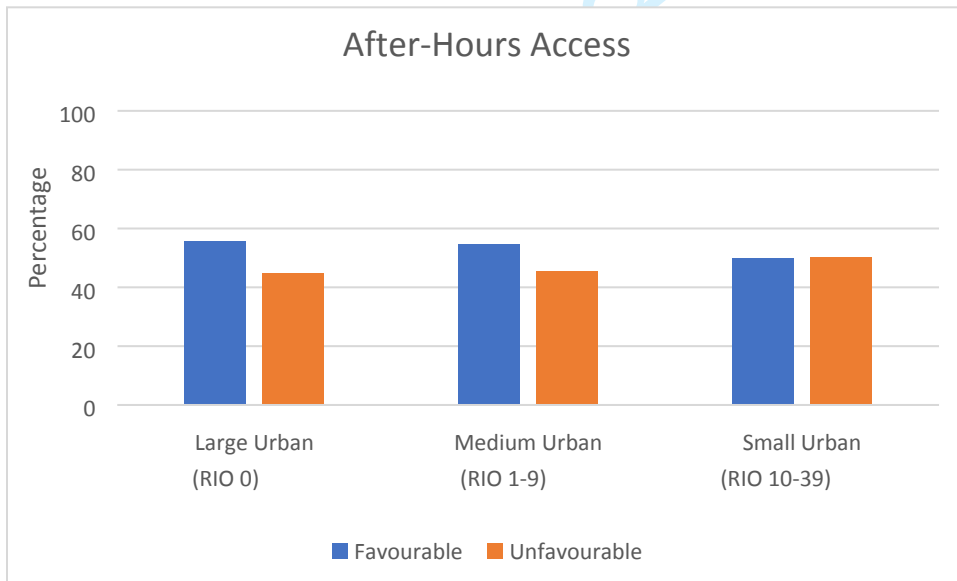

1  
2  
3  
4  
5  
6  
7  
8  
9  
10  
11  
12  
13  
14  
15  
16  
17  
18  
19  
20  
21  
22  
23  
24  
25  
26  
27  
28  
29  
30  
31  
32  
33  
34  
35  
36  
37  
38  
39  
40  
41  
42  
43  
44  
45  
46  
47  
48  
49  
50  
51  
52  
53  
54  
55  
56  
57  
58  
59  
60

Figure 2c. Wait Time for Care

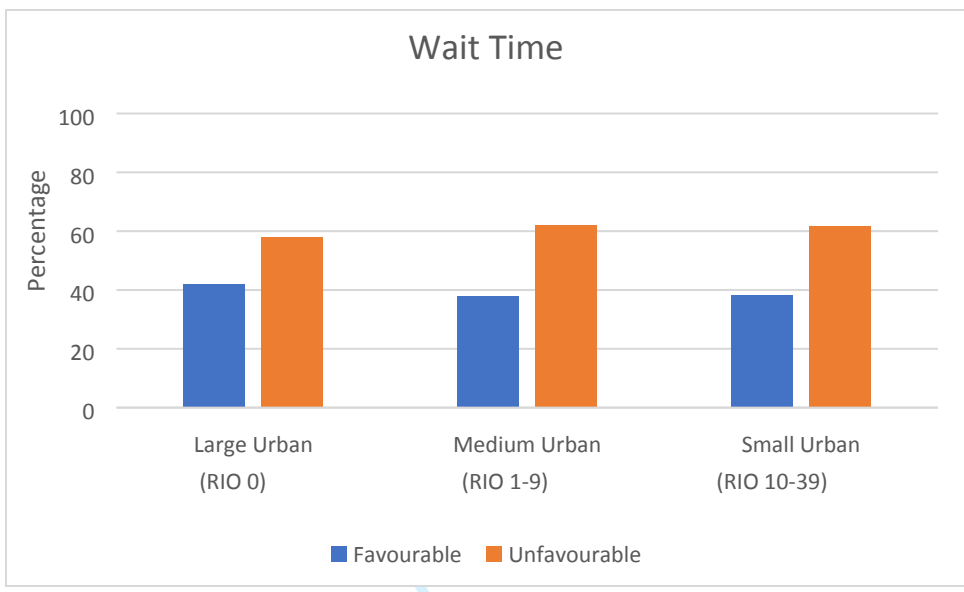

Figure 2d. Timeliness of Wait for Care

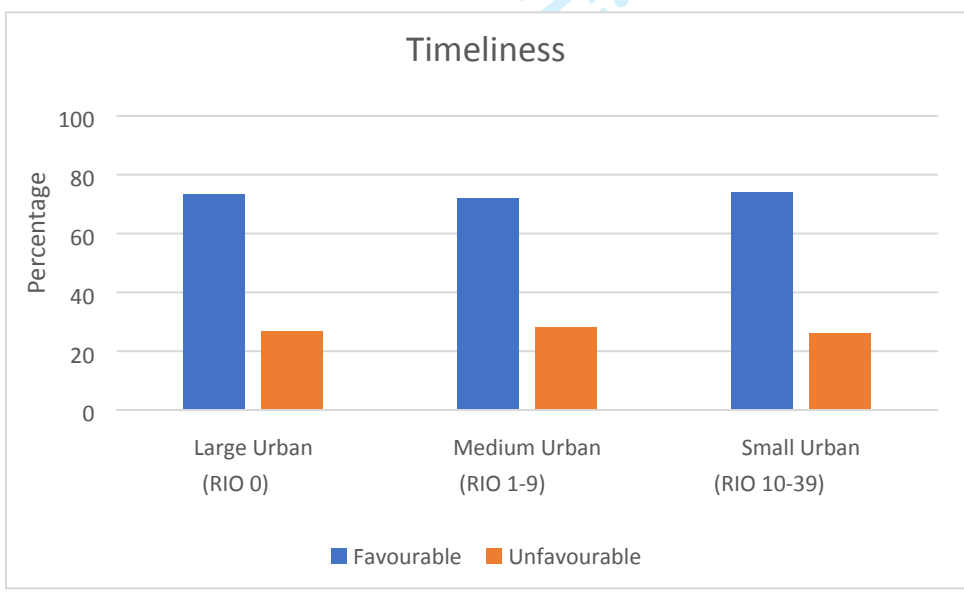

**Figure 3. Multilevel Univariate Regression Analysis**

Figure 3a. Telephone Access

  $p < 0.05, 95\% \text{ CI}$     Q1 = reference  
(lowest quintile)

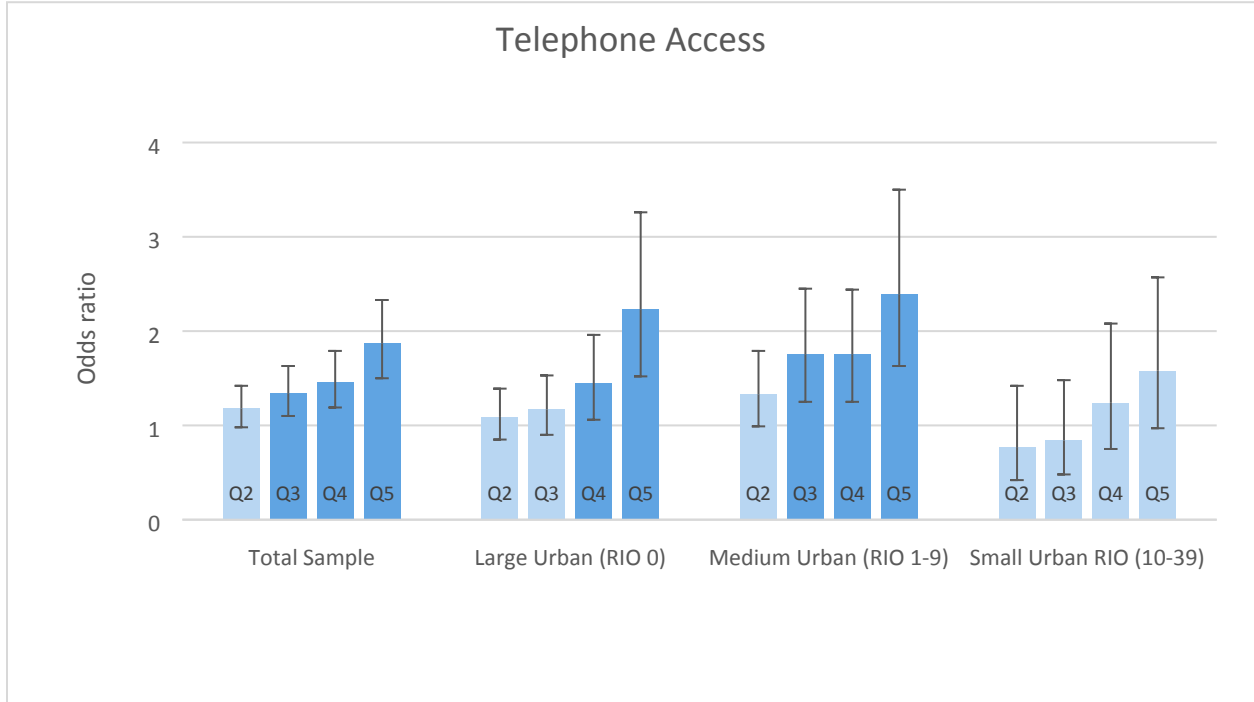

Figure 3b. After-Hours Access

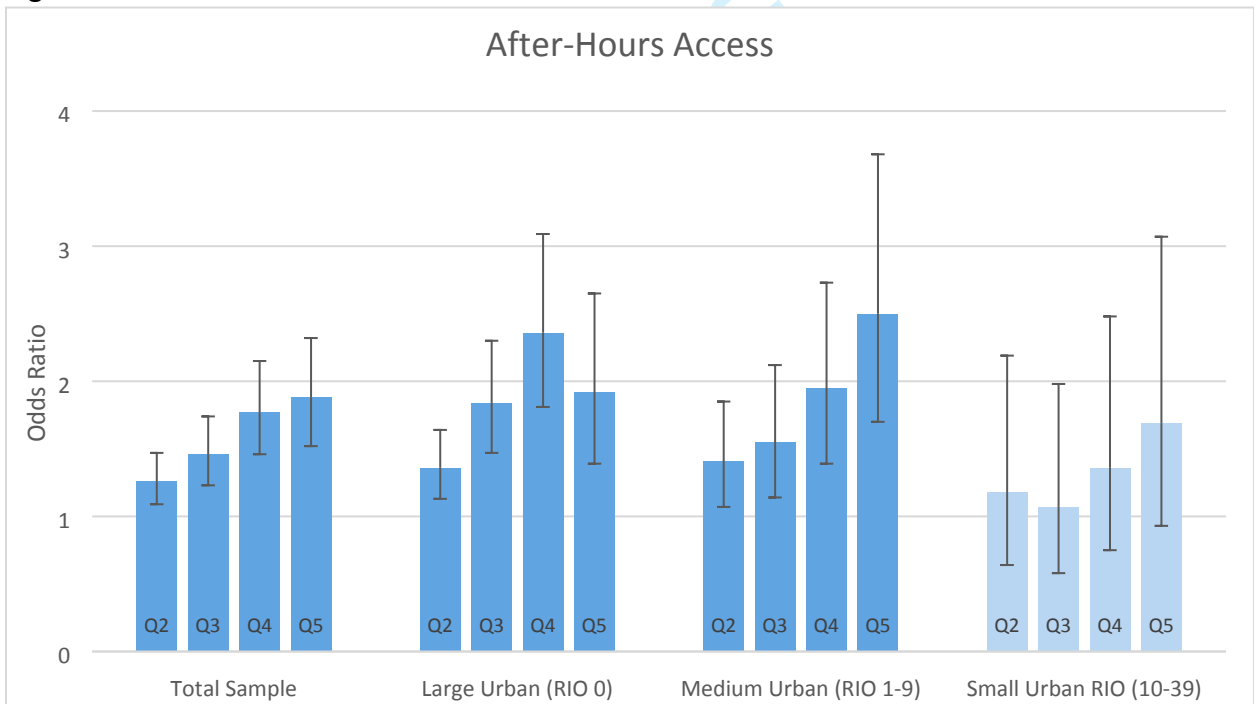

Figure 3c. Wait Time for Care

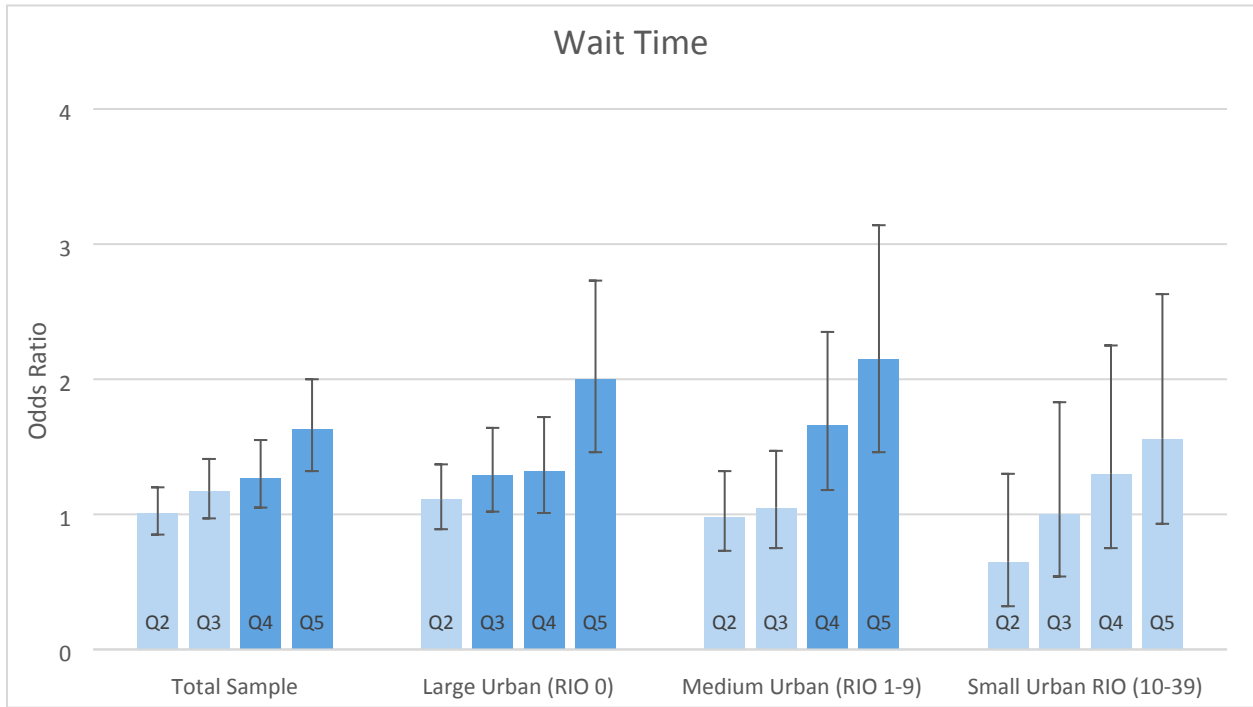

Figure 3d. Timeliness of Wait for Care

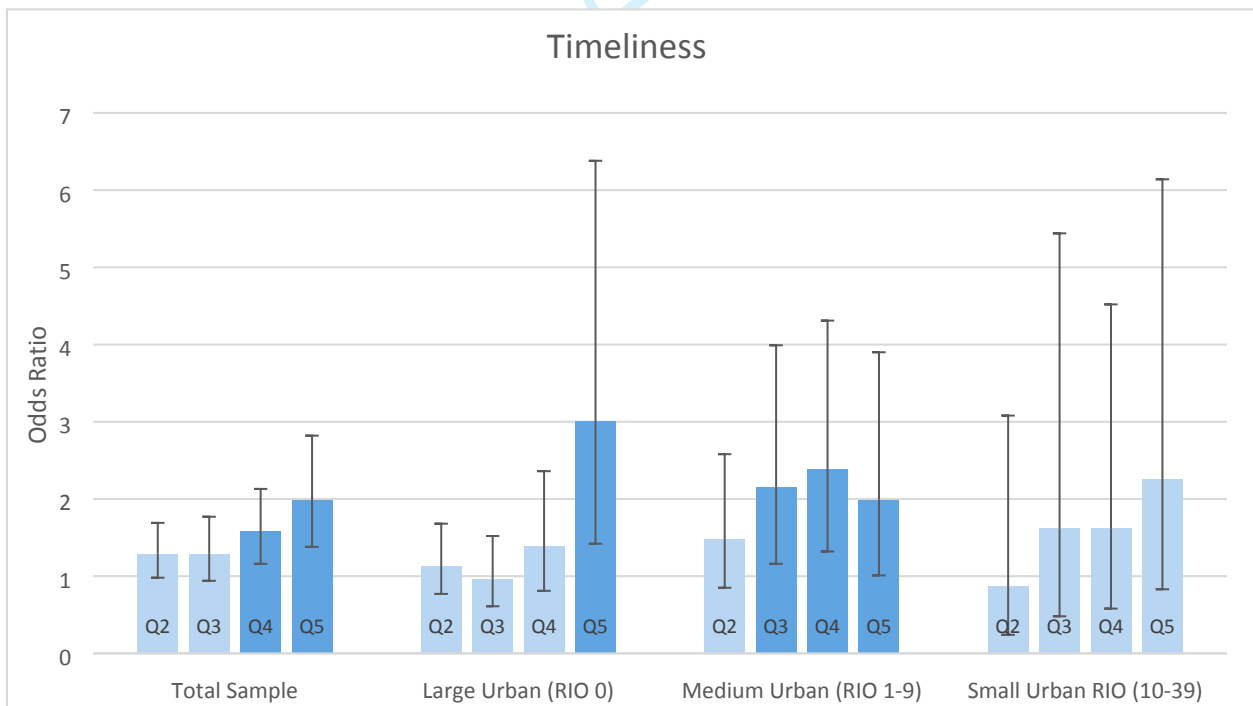

### Figure 4. Multilevel Multivariate Logistic Regression Analysis

Figure 4a. Telephone Access

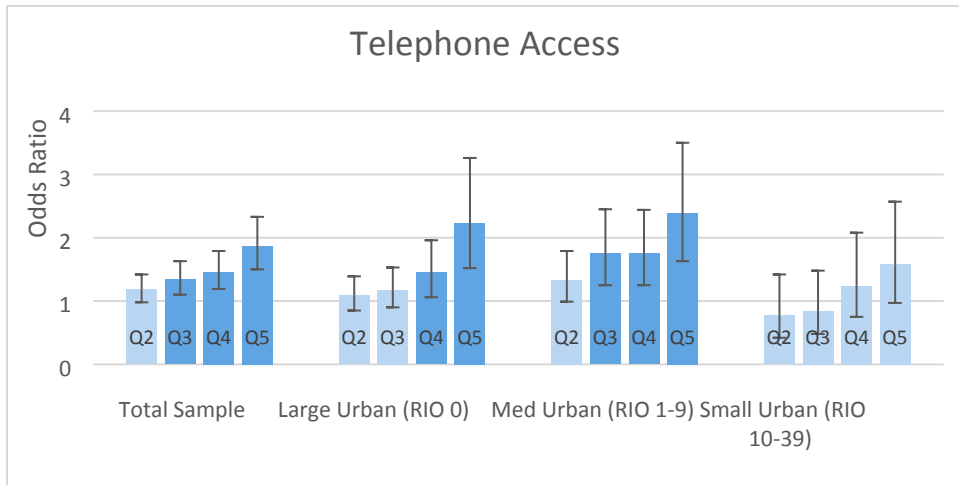

■  $p < 0.05$

—|—| 95% confidence interval

Q1 = reference (lowest quintile)

Figure 4b. After-Hours Access

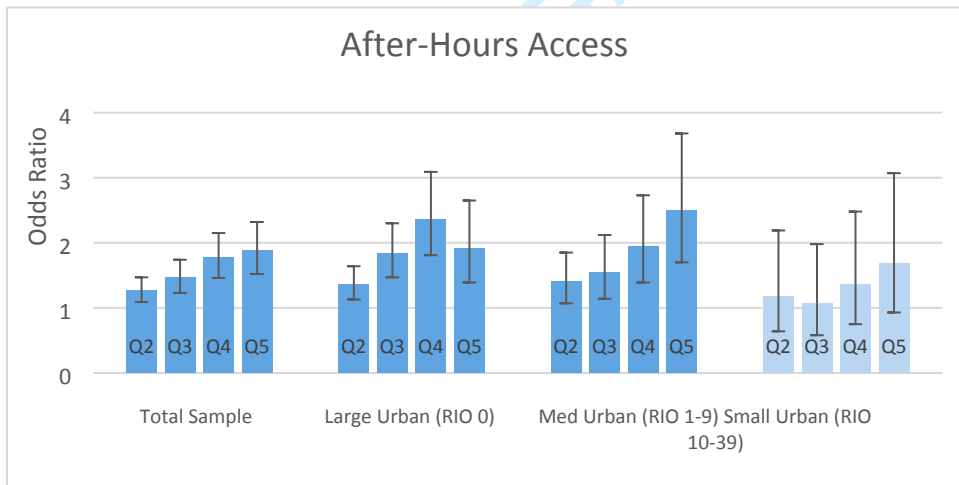

1  
2  
3  
4  
5  
6  
7  
8  
9  
10  
11  
12  
13  
14  
15  
16  
17  
18  
19  
20  
21  
22  
23  
24  
25  
26  
27  
28  
29  
30  
31  
32  
33  
34  
35  
36  
37  
38  
39  
40  
41  
42  
43  
44  
45  
46  
47  
48  
49  
50  
51  
52  
53  
54  
55  
56  
57  
58  
59  
60

Figure 4c. Wait Time for Care

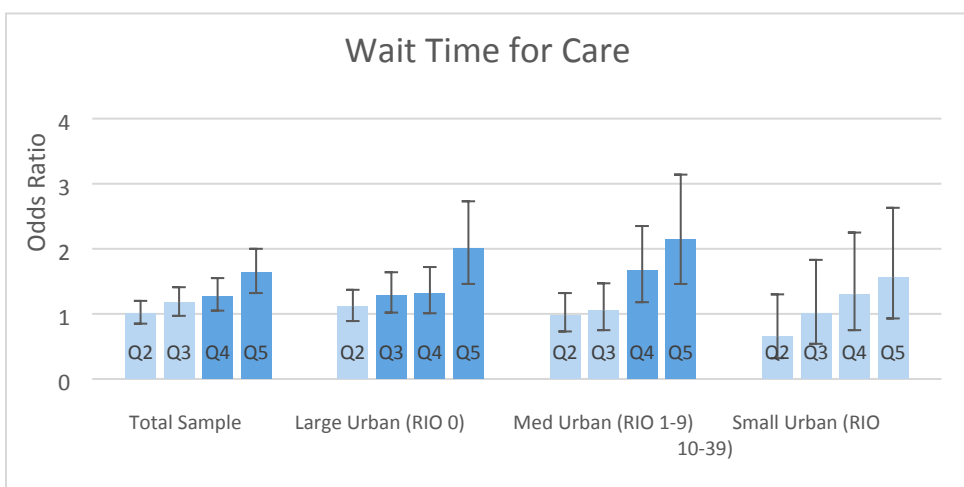

Figure 4d. Timeliness of Wait for Care

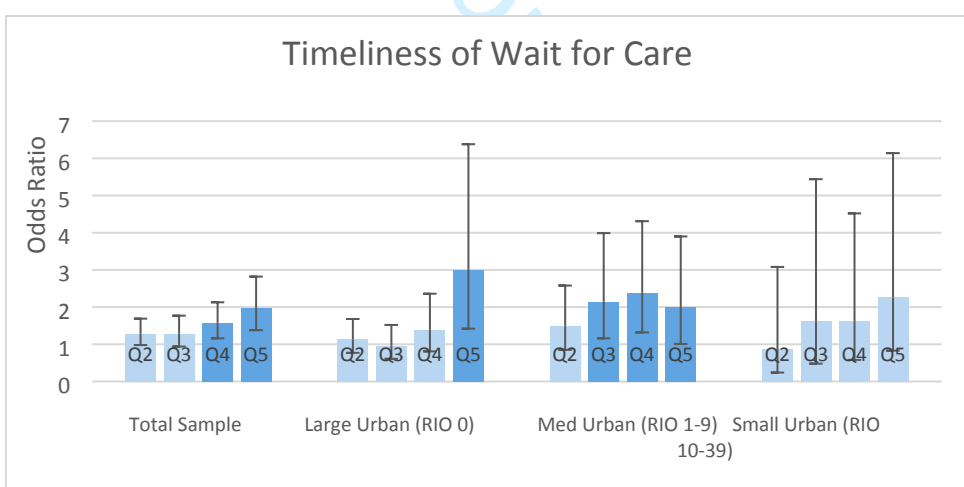

**Table 1. Outcome Variables and Coding Schemes**

| Patient-Reported Access Variable   | HCES Question Stem                                                                                                                                                                           | Coding Scheme for Answer Choices                                                                                             |
|------------------------------------|----------------------------------------------------------------------------------------------------------------------------------------------------------------------------------------------|------------------------------------------------------------------------------------------------------------------------------|
| <b>Telephone Access</b>            | How often did your provider or someone else in the office speak to you when you called or get back to you the same day?*                                                                     | Favourable: Always, often<br>Unfavourable: Sometimes, rarely, never, volunteers “it depends”<br>Missing: Don’t know, refused |
| <b>After-Hours Access</b>          | Not including hospital emergency departments, does your provider have an after-hours clinic where patients can be seen by or talk to a doctor or nurse when the provider’s office is closed? | Favourable: Yes<br>Unfavourable: No, Don’t know<br>Missing: Refused                                                          |
| <b>Wait Time for Care</b>          | How many days did it take from when you first tried to see your provider to when you actually saw them or someone else in their office?***                                                   | Favourable: Same day, next day<br>Unfavourable: 2 to 20+ days<br>Missing: Don’t know, refused                                |
| <b>Timeliness of Wait for Care</b> | Would you say the length of time it took between making the appointment and the actual visit was about right, somewhat too long, or much too long?***                                        | Favourable: About right<br>Unfavourable: Somewhat too long, much too long<br>Missing: Other, don’t know, refused             |

\*Asked only of those answering “Yes” to the question, “Have you called or tried to call your provider’s office with a medical question or concern during the day on a Monday to Friday in the last 12 months?”

\*\*\*Asked only of those answering “Yes” to the question, “Not counting yearly check-ups or monitoring of an ongoing health issue, in the last 12 months did you want to see your provider because you were sick or had a health concern?”

Table 2. Practice Characteristics

|                                                                                  | <b>Total Sample<br/>(RIO 0-39)<br/>n = 414</b> | <b>Large Urban<br/>(RIO 0)<br/>n = 210</b> | <b>Medium Urban<br/>(RIO 1-9)<br/>n = 130</b> | <b>Small Urban<br/>(RIO 10-39)<br/>n = 74</b> |
|----------------------------------------------------------------------------------|------------------------------------------------|--------------------------------------------|-----------------------------------------------|-----------------------------------------------|
| <b>Non-team</b>                                                                  | 277 (66.91%)                                   | 142 (67.62%)                               | 100 (76.92%)                                  | 35 (47.30%)                                   |
| <b>Team</b>                                                                      | 137 (33.09%)                                   | 68 (32.38%)                                | 30 (23.08%)                                   | 39 (52.70%)                                   |
| <b>Mean number of<br/>physicians per<br/>practice (SD)<br/>n = 414</b>           | 10.45 (9.59)                                   | 10.61 (9.37)                               | 9.35 (7.99)                                   | 11.96(12.29)                                  |
| <b>Mean number of<br/>after-hours<br/>services per year<br/>(SD)<br/>n = 400</b> | 3935.06 (4797.38)                              | 3962.48 (4760.05)                          | 3924.26 (3662.87)                             | 3876 (6347.27)                                |



Table 3. Physician Characteristics

|                                                                          | <b>Total Sample<br/>(RIO 0-39)<br/>(n = 3940)</b> | <b>Large Urban<br/>(RIO 0)<br/>(n = 2026)</b> | <b>Medium Urban<br/>(RIO 1-9)<br/>(n = 1222)</b> | <b>Small Urban<br/>(RIO 10-39)<br/>(n = 692)</b> |
|--------------------------------------------------------------------------|---------------------------------------------------|-----------------------------------------------|--------------------------------------------------|--------------------------------------------------|
| <b>Age (years)<br/>(mean(SD))<br/>n = 3940</b>                           | 51.89 (11.36)                                     | 51.59 (11.66)                                 | 51.77 (11.04)                                    | 52.97 (10.94)                                    |
| <b>Years in practice<br/>(mean(SD))<br/>n = 3938</b>                     | 26.77 (3.17)                                      | 26.72 (2.96)                                  | 26.75 (3.21)                                     | 26.96 (3.64)                                     |
| <b>Roster size<br/>(mean(SD))<br/>n = 3940</b>                           | 1521.77 (638.86)                                  | 1434.81 (658)                                 | 1638.26 (603.47)                                 | 1570.81 (604.6)                                  |
| <b>Gender (n=3940)</b>                                                   |                                                   |                                               |                                                  |                                                  |
| <b>Female<br/>(n(%))</b>                                                 | 1872 (47.51%)                                     | 1100 (54.29%)                                 | 535 (43.78%)                                     | 237 (34.25%)                                     |
| <b>Male<br/>(n(%))</b>                                                   | 2068 (52.49%)                                     | 926 (45.71%)                                  | 687 (56.22%)                                     | 455 (65.75%)                                     |
| <b>Canadian<br/>Graduate (n=3938)</b>                                    |                                                   |                                               |                                                  |                                                  |
| <b>No</b>                                                                | 907 (23.03%)                                      | 416 (20.53%)                                  | 328 (26.84%)                                     | 163 (23.56%)                                     |
| <b>Yes</b>                                                               | 3031 (76.97%)                                     | 1608 (79.37%)                                 | 894 (73.16%)                                     | 529 (76.44%)                                     |
| <b>Proportion of<br/>maximum<br/>potential Access<br/>Bonus achieved</b> | 40.26% (30.67)                                    | 32.86% (28.39)                                | 40.63% (30.30)                                   | 61.23% (27.87)                                   |

|                                                         |              |              |              |              |
|---------------------------------------------------------|--------------|--------------|--------------|--------------|
| <b>(mean (SD))<br/>(n=3940)</b>                         |              |              |              |              |
| <b>Access Bonus<br/>achievement by<br/>Quintile (%)</b> |              |              |              |              |
| <b>1 (lowest)</b>                                       | 877 (22.26%) | 545 (26.90%) | 269 (22.01%) | 63 (9.10%)   |
| <b>2</b>                                                | 865 (21.95%) | 554 (27.34%) | 260 (21.28%) | 51 (7.37%)   |
| <b>3</b>                                                | 818 (20.76%) | 457 (22.56%) | 253 (20.7%)  | 108 (15.61%) |
| <b>4</b>                                                | 726 (18.43%) | 298 (14.71%) | 253 (20.7%)  | 175 (25.29%) |
| <b>5 (highest)</b>                                      | 654 (16.60%) | 172 (8.49%)  | 187 (15.3%)  | 295 (42.63%) |

Table 4. Patient Characteristics

|                                                               | <b>Total Sample<br/>(RIO 0-39)<br/>(n = 18893)</b> | <b>Large Urban<br/>(RIO 0)<br/>(n = 8325)</b> | <b>Medium<br/>Urban<br/>(RIO 1-9)<br/>(n = 6214)</b> | <b>Small Urban<br/>(RIO 10-39)<br/>(n = 4354)</b> |
|---------------------------------------------------------------|----------------------------------------------------|-----------------------------------------------|------------------------------------------------------|---------------------------------------------------|
| <b>Gender (n = 18,893)</b>                                    |                                                    |                                               |                                                      |                                                   |
| <b>Female</b>                                                 | 11278 (59.69%)                                     | 5066 (60.85%)                                 | 3664 (58.96%)                                        | 2548 (58.52%)                                     |
| <b>Male</b>                                                   | 7615 (40.31%)                                      | 3259 (39.15%)                                 | 2550 (41.04%)                                        | 1806 (41.48%)                                     |
| <b>Age Groups in years (n=18,893)</b>                         |                                                    |                                               |                                                      |                                                   |
| <b>&lt; 18</b>                                                | 374 (1.98%)                                        | 168 (2.02%)                                   | 118 (1.9%)                                           | 88 (2.02%)                                        |
| <b>19-34</b>                                                  | 2444 (12.94%)                                      | 1089 (13.08%)                                 | 871 (14.02%)                                         | 484 (11.12%)                                      |
| <b>35-49</b>                                                  | 4562 (24.15%)                                      | 2138 (25.68%)                                 | 1528 (24.59%)                                        | 896 (20.58%)                                      |
| <b>50-64</b>                                                  | 5859 (31.01%)                                      | 2500 (30.03%)                                 | 1925 (30.98%)                                        | 1434 (32.94%)                                     |
| <b>65-74</b>                                                  | 3436 (18.19%)                                      | 1469 (17.65%)                                 | 1079 (17.36%)                                        | 888 (20.4%)                                       |
| <b>75+</b>                                                    | 2218 (11.74%)                                      | 961 (11.54%)                                  | 693 (11.15%)                                         | 564 (12.95%)                                      |
| <b>Language (n = 18,815)</b>                                  |                                                    |                                               |                                                      |                                                   |
| <b>English, English &amp; French,<br/>English &amp; other</b> | 17294 (91.92%)                                     | 7406 (89.46%)                                 | 5719 (92.36%)                                        | 4169 (95.97%)                                     |
| <b>French</b>                                                 | 436 (2.32%)                                        | 170 (2.05%)                                   | 160 (2.58%)                                          | 106 (2.44%)                                       |
| <b>Other</b>                                                  | 1085 (5.77%)                                       | 703 (8.49%)                                   | 313 (5.06%)                                          | 69 (1.59%)                                        |
| <b>Education (n = 18,749)</b>                                 |                                                    |                                               |                                                      |                                                   |
| <b>Some high school or less</b>                               | 1998 (10.66%)                                      | 720 (8.72%)                                   | 662 (10.72%)                                         | 616 (14.26%)                                      |
| <b>High school</b>                                            | 3760 (20.05%)                                      | 1431 (17.33%)                                 | 1266 (20.51%)                                        | 1063 (24.61%)                                     |
| <b>Some post-secondary</b>                                    | 1652 (8.81%)                                       | 689 (8.34%)                                   | 569 (9.22%)                                          | 394 (9.12%)                                       |
| <b>College</b>                                                | 4868 (25.96%)                                      | 1949 (23.60%)                                 | 1660 (26.89%)                                        | 1259 (29.15%)                                     |
| <b>University</b>                                             | 4304 (22.96%)                                      | 2185 (26.46%)                                 | 1410 (22.84%)                                        | 709 (16.42%)                                      |
| <b>Post-graduate</b>                                          | 2167 (11.56%)                                      | 1283 (15.54%)                                 | 606 (9.82%)                                          | 278 (6.44%)                                       |

|                                                  |                |               |               |               |
|--------------------------------------------------|----------------|---------------|---------------|---------------|
| <b>Income Quintile (n = 18,836)</b>              |                |               |               |               |
| <b>1 (lowest)</b>                                | 2854 (15.15%)  | 1349 (16.27%) | 865 (13.95%)  | 640 (14.74%)  |
| <b>2</b>                                         | 3327 (17.66%)  | 1519 (18.32%) | 986 (15.90%)  | 822 (18.94%)  |
| <b>3</b>                                         | 3795 (20.15%)  | 1659 (20.01%) | 1207 (19.46%) | 929 (21.40%)  |
| <b>4</b>                                         | 4257 (22.60%)  | 1765 (21.29%) | 1467 (23.65%) | 1025 (23.61%) |
| <b>5 (highest)</b>                               | 4603 (24.44%)  | 2000 (24.12%) | 1678 (27.05%) | 925 (21.31%)  |
| <b>Immigrant* (n = 18,822)</b>                   |                |               |               |               |
| <b>Yes</b>                                       | 4096 (21.76%)  | 2312 (27.93%) | 1266 (20.42%) | 518 (11.92%)  |
| <b>No</b>                                        | 14726 (78.24%) | 5965 (72.07%) | 4933 (79.58%) | 3828 (88.08%) |
| <b>Self-Reported General Health (n = 18,818)</b> |                |               |               |               |
| <b>Poor</b>                                      | 781 (4.15%)    | 307 (3.70%)   | 259 (4.18%)   | 215 (4.96%)   |
| <b>Fair</b>                                      | 2087 (11.09%)  | 904 (10.91%)  | 682 (11.01%)  | 501 (11.55%)  |
| <b>Good</b>                                      | 5290 (28.11%)  | 2258 (27.24%) | 1808 (29.19%) | 1224 (28.22%) |
| <b>Very good</b>                                 | 7129 (37.88%)  | 3164 (38.18%) | 2353 (37.01%) | 1622 (37.40%) |
| <b>Excellent</b>                                 | 3531 (18.76%)  | 1655 (19.97%) | 1101 (4.18%)  | 775 (17.87%)  |

\*Mean years since immigration (SD)

Large Urban = 34.29 (18.54)

Medium Urban = 37.95 (19.15)

Small Urban = 44.58 (17.42)

**Table 5a. Multivariate analysis - Telephone Access****Bold** = statistically significant,  $p < 0.05$ , 95% CI

|                              | Total (RIO 0-39)<br>(patient n =<br>10,778) | RIO 0<br>(patient n = 4,642) | RIO 1-9<br>(patient n = 3,542) | RIO 10-39<br>(patient n = 2,594) |
|------------------------------|---------------------------------------------|------------------------------|--------------------------------|----------------------------------|
|                              | OR (CI)                                     | OR (CI)                      | OR (CI)                        | OR (CI)                          |
| <b>MAIN EXPOSURE</b>         |                                             |                              |                                |                                  |
| <b>Access Bonus Quintile</b> |                                             |                              |                                |                                  |
| 1 (lowest)                   | ref                                         | ref                          | ref                            | ref                              |
| 2                            | 1.18 (0.98, 1.42)                           | 1.09 (0.85, 1.39)            | 1.33 (0.99, 1.79)              | 0.77 (0.42, 1.42)                |
| 3                            | <b>1.34 (1.1, 1.63)</b>                     | 1.17 (0.9, 1.53)             | <b>1.75 (1.25, 2.45)</b>       | 0.84 (0.48, 1.48)                |
| 4                            | <b>1.46 (1.19, 1.79)</b>                    | <b>1.45 (1.06, 1.96)</b>     | <b>1.75 (1.25, 2.44)</b>       | 1.24 (0.75, 2.08)                |
| 5 (highest)                  | <b>1.87 (1.5, 2.33)</b>                     | <b>2.23 (1.52, 3.26)</b>     | <b>2.39 (1.63, 3.5)</b>        | 1.58 (0.97, 2.57)                |
| <b>ICC -practice</b>         | 3.26%                                       | 1.80%                        | 2.18%                          | 1.78%                            |
| <b>ICC -physician</b>        | 6.70%                                       | 6.74%                        | 6.52%                          | 7.98%                            |
|                              |                                             |                              |                                |                                  |
| <b>PATIENT</b>               |                                             |                              |                                |                                  |
| <b>Gender</b>                |                                             |                              |                                |                                  |
| Male                         | ref                                         | ref                          | ref                            | ref                              |
| Female                       | 0.99 (0.89, 1.1)                            | 1.05 (0.89, 1.25)            | 0.96 (0.8, 1.16)               | 0.94 (0.75, 1.18)                |
| <b>Age</b>                   |                                             |                              |                                |                                  |
| <18                          | ref                                         | ref                          | ref                            | ref                              |
| 19-34                        | 0.84 (0.5, 1.39)                            | 1.2 (0.56, 2.54)             | 0.99 (0.41, 2.36)              | 0.33 (0.09, 1.22)                |
| 35-49                        | 0.88 (0.53, 1.45)                           | 1.16 (0.55, 2.42)            | 1.08 (0.46, 2.54)              | 0.35 (0.1, 1.28)                 |
| 50-64                        | 0.94 (0.57, 1.54)                           | 1.23 (0.59, 2.57)            | 1.1 (0.47, 2.57)               | 0.42 (0.12, 1.53)                |
| 65-74                        | 1.56 (0.94, 2.58)                           | <b>2.14 (1.01, 4.52)</b>     | 1.79 (0.76, 4.25)              | 0.69 (0.19, 2.54)                |
| 75+                          | 1.4 (0.84, 2.34)                            | 1.35 (0.64, 2.88)            | 2.03 (0.84, 4.93)              | 0.74 (0.2, 2.78)                 |
| <b>Education</b>             |                                             |                              |                                |                                  |
| Some high school or less     | ref                                         | ref                          | ref                            | ref                              |
| High School                  | <b>1.32 (1.07, 1.63)</b>                    | 1.34 (0.93, 1.93)            | 1.3 (0.9, 1.87)                | 1.29 (0.87, 1.91)                |
| Some postsecondary           | <b>1.37 (1.07, 1.76)</b>                    | 1.25 (0.83, 1.88)            | <b>1.76 (1.14, 2.72)</b>       | 1 (0.63, 1.59)                   |
| College                      | 1.18 (0.96, 1.46)                           | 1.24 (0.87, 1.77)            | 1.26 (0.88, 1.8)               | 0.99 (0.67, 1.44)                |
| University                   | 1.17 (0.94, 1.45)                           | 1.09 (0.77, 1.56)            | 1.24 (0.85, 1.8)               | 1.03 (0.68, 1.55)                |
| Postgraduate                 | 1.02 (0.8, 1.29)                            | 0.98 (0.67, 1.43)            | 1.14 (0.74, 1.74)              | 0.76 (0.46, 1.26)                |

|                                                            |                          |                          |                          |                          |
|------------------------------------------------------------|--------------------------|--------------------------|--------------------------|--------------------------|
| <b>Primary Language</b>                                    |                          |                          |                          |                          |
| Other                                                      | ref                      | ref                      | ref                      | ref                      |
| English,<br>English and<br>French,<br>English and<br>Other | 1.08 (0.84, 1.4)         | 0.94 (0.67, 1.32)        | <b>1.61 (1.02, 2.54)</b> | 0.86 (0.31, 2.4)         |
| French                                                     | 0.93 (0.61, 1.42)        | 0.72 (0.37, 1.39)        | 1.24 (0.61, 2.51)        | 1.08 (0.31, 3.85)        |
| <b>Health Status</b>                                       |                          |                          |                          |                          |
| Poor                                                       | ref                      | ref                      | ref                      | ref                      |
| Fair                                                       | <b>1.29 (1.01, 1.66)</b> | 1.37 (0.9, 2.08)         | 1.13 (0.73, 1.74)        | 1.24 (0.77, 2)           |
| Good                                                       | <b>1.41 (1.12, 1.77)</b> | 1.35 (0.91, 1.98)        | 1.46 (0.98, 2.17)        | 1.31 (0.85, 2)           |
| Very good                                                  | <b>1.98 (1.57, 2.49)</b> | <b>1.97 (1.33, 2.9)</b>  | <b>1.83 (1.23, 2.71)</b> | <b>2.06 (1.34, 3.16)</b> |
| Excellent                                                  | <b>2.21 (1.72, 2.83)</b> | <b>2.3 (1.51, 3.49)</b>  | <b>1.69 (1.11, 2.59)</b> | <b>2.97 (1.82, 4.85)</b> |
| <b>Income Quintile</b>                                     |                          |                          |                          |                          |
| 1 (lowest)                                                 | ref                      | ref                      | ref                      | ref                      |
| 2                                                          | 1.01 (0.85, 1.2)         | 1.1 (0.84, 1.44)         | 0.99 (0.72, 1.35)        | 0.97 (0.68, 1.4)         |
| 3                                                          | 1.07 (0.9, 1.27)         | 1.07 (0.82, 1.4)         | 1.2 (0.88, 1.62)         | 0.99 (0.69, 1.43)        |
| 4                                                          | 1 (0.84, 1.18)           | 1.12 (0.86, 1.46)        | 1.1 (0.82, 1.48)         | 0.84 (0.59, 1.19)        |
| 5                                                          | 1.08 (0.91, 1.28)        | 1.11 (0.86, 1.45)        | 1.24 (0.93, 1.65)        | 0.88 (0.61, 1.26)        |
| <b>Immigrant Status</b>                                    |                          |                          |                          |                          |
| Yes                                                        | ref                      | ref                      | ref                      | ref                      |
| No                                                         | <b>1.19 (1.03, 1.37)</b> | <b>1.25 (1.02, 1.53)</b> | 1.12 (0.87, 1.44)        | 1.17 (0.83, 1.65)        |
| <b>PHYSICIAN</b>                                           |                          |                          |                          |                          |
| <b>Age</b>                                                 | 1.01 (1, 1.01)           | 1.01 (1, 1.01)           | 1.01 (1, 1.02)           | 1 (0.99, 1.01)           |
| <b>Gender</b>                                              |                          |                          |                          |                          |
| Male                                                       | ref                      | ref                      | ref                      | ref                      |
| Female                                                     | 0.98 (0.86, 1.11)        | 0.89 (0.73, 1.08)        | 1 (0.81, 1.24)           | 1 (0.76, 1.33)           |
| <b>Canadian Graduate</b>                                   |                          |                          |                          |                          |
| No                                                         | ref                      | ref                      | ref                      | ref                      |
| Yes                                                        | <b>1.2 (1.05, 1.37)</b>  | <b>1.3 (1.04, 1.62)</b>  | <b>1.27 (1.02, 1.58)</b> | 0.87 (0.65, 1.17)        |
| <b>Years in Practice</b>                                   | 0.98 (0.96, 0.99)        | 0.96 (0.94, 0.99)        | 0.99 (0.96, 1.02)        | 0.98 (0.95, 1.01)        |
| <b>Roster Size</b>                                         | 1 (1, 1)                 | 1 (1, 1)                 | 1 (1, 1)                 | 1 (1, 1)                 |
| <b>PRACTICE</b>                                            |                          |                          |                          |                          |
| <b>Group Size</b>                                          | 1 (1, 1.01)              | 1.01 (1, 1.02)           | 0.99 (0.98, 1)           | 1.01 (1, 1.02)           |

|                                       |                   |                   |                   |                   |
|---------------------------------------|-------------------|-------------------|-------------------|-------------------|
| <b>Number of after-hours services</b> | 1 (1, 1)          | 1 (1, 1)          | 1 (1, 1)          | 1 (1, 1)          |
| <b>Practice Model</b>                 |                   |                   |                   |                   |
| Non-team                              | ref               | ref               | ref               | ref               |
| Team                                  | 0.92 (0.79, 1.07) | 0.86 (0.69, 1.07) | 1.19 (0.91, 1.56) | 0.72 (0.53, 0.98) |

Confidential

**Table 5b. Multivariate analysis – After-Hours Access****Bold** = statistically significant,  $p < 0.05$ , 95% CI

|                              | Total (RIO 0-39)<br>(patient n =<br>10,778) | RIO 0<br>(patient n = 4,642) | RIO 1-9<br>(patient n = 3,542) | RIO 10-39<br>(patient n = 2,594) |
|------------------------------|---------------------------------------------|------------------------------|--------------------------------|----------------------------------|
|                              | OR (CI)                                     | OR (CI)                      | OR (CI)                        | OR (CI)                          |
| <b>MAIN EXPOSURE</b>         |                                             |                              |                                |                                  |
| <b>Access Bonus Quintile</b> |                                             |                              |                                |                                  |
| 1 (lowest)                   | ref                                         | ref                          | ref                            | ref                              |
| 2                            | <b>1.26 (1.09, 1.47)</b>                    | <b>1.36 (1.13, 1.64)</b>     | <b>1.41 (1.07, 1.85)</b>       | 1.18 (0.64, 2.19)                |
| 3                            | <b>1.46 (1.23, 1.74)</b>                    | <b>1.84 (1.47, 2.3)</b>      | <b>1.55 (1.14, 2.12)</b>       | 1.07 (0.58, 1.98)                |
| 4                            | <b>1.77 (1.46, 2.15)</b>                    | <b>2.36 (1.81, 3.09)</b>     | <b>1.95 (1.39, 2.73)</b>       | 1.36 (0.75, 2.48)                |
| 5 (highest)                  | <b>1.88 (1.52, 2.32)</b>                    | <b>1.92 (1.39, 2.65)</b>     | <b>2.5 (1.7, 3.68)</b>         | 1.69 (0.93, 3.07)                |
| <b>ICC -practice</b>         | 17.25%                                      | 13.03%                       | 17.67%                         | 22.85%                           |
| <b>ICC -physician</b>        | 5.66%                                       | 4.8%                         | 6.99%                          | 4.53%                            |
|                              |                                             |                              |                                |                                  |
| <b>PATIENT</b>               |                                             |                              |                                |                                  |
| <b>Gender</b>                |                                             |                              |                                |                                  |
| Male                         | ref                                         | ref                          | ref                            | ref                              |
| Female                       | <b>1.57 (1.46, 1.68)</b>                    | <b>1.76 (1.58, 1.96)</b>     | <b>1.39 (1.23, 1.57)</b>       | <b>1.54 (1.33, 1.79)</b>         |
| <b>Age</b>                   |                                             |                              |                                |                                  |
| <18                          | ref                                         | ref                          | ref                            | Ref                              |
| 19-34                        | <b>1.66 (1.26, 2.17)</b>                    | <b>2.04 (1.34, 3.08)</b>     | 1.55 (0.96, 2.51)              | 1.42 (0.81, 2.48)                |
| 35-49                        | <b>2.45 (1.88, 3.19)</b>                    | <b>3.13 (2.09, 4.69)</b>     | <b>2.52 (1.57, 4.06)</b>       | 1.66 (0.96, 2.86)                |
| 50-64                        | <b>2.47 (1.9, 3.2)</b>                      | <b>3.06 (2.06, 4.57)</b>     | <b>2.69 (1.69, 4.29)</b>       | 1.59 (0.94, 2.71)                |
| 65-74                        | <b>2.38 (1.83, 3.1)</b>                     | <b>3.19 (2.13, 4.77)</b>     | <b>2.71 (1.69, 4.34)</b>       | 1.35 (0.79, 2.32)                |
| 75+                          | <b>1.82 (1.39, 2.38)</b>                    | <b>2.22 (1.47, 3.33)</b>     | <b>1.84 (1.14, 2.97)</b>       | 1.3 (0.75, 2.26)                 |
| <b>Education</b>             |                                             |                              |                                |                                  |
| Some high school or less     | ref                                         | ref                          | ref                            | Ref                              |
| High School                  | 1.13 (0.99, 1.28)                           | 1.13 (0.91, 1.41)            | 1.04 (0.83, 1.3)               | 1.19 (0.93, 1.51)                |



|                                                |                          |                          |                          |                   |
|------------------------------------------------|--------------------------|--------------------------|--------------------------|-------------------|
| Some postsecondary                             | 1.13 (0.97, 1.33)        | 1.2 (0.93, 1.55)         | 1.12 (0.85, 1.46)        | 1.01 (0.74, 1.37) |
| College                                        | <b>1.29 (1.13, 1.48)</b> | <b>1.29 (1.04, 1.61)</b> | <b>1.31 (1.04, 1.64)</b> | 1.25 (0.97, 1.6)  |
| University                                     | <b>1.28 (1.11, 1.47)</b> | <b>1.37 (1.1, 1.71)</b>  | 1.21 (0.95, 1.53)        | 1.15 (0.87, 1.52) |
| Postgraduate                                   | <b>1.33 (1.14, 1.55)</b> | <b>1.46 (1.15, 1.85)</b> | 1.13 (0.85, 1.49)        | 1.27 (0.89, 1.81) |
| <b>Primary Language</b>                        |                          |                          |                          |                   |
| Other                                          | ref                      | ref                      | ref                      | ref               |
| English, English and French, English and Other | <b>1.62 (1.37, 1.92)</b> | <b>1.57 (1.26, 1.95)</b> | <b>1.81 (1.32, 2.48)</b> | 1.23 (0.67, 2.25) |
| French                                         | 1.11 (0.83, 1.48)        | 0.87 (0.57, 1.33)        | 1.43 (0.88, 2.33)        | 0.73 (0.32, 1.64) |
| <b>Health Status</b>                           |                          |                          |                          |                   |
| Poor                                           | ref                      | ref                      | ref                      | ref               |
| Fair                                           | 1.09 (0.9, 1.32)         | 0.98 (0.72, 1.33)        | 1.21 (0.87, 1.69)        | 0.94 (0.64, 1.39) |
| Good                                           | 1.05 (0.88, 1.26)        | 1 (0.75, 1.34)           | 1.12 (0.83, 1.52)        | 0.89 (0.63, 1.26) |
| Very good                                      | 1.18 (0.99, 1.41)        | 1.12 (0.84, 1.49)        | 1.21 (0.89, 1.64)        | 1.03 (0.73, 1.46) |
| Excellent                                      | 1.04 (0.86, 1.25)        | 0.97 (0.72, 1.31)        | 1.04 (0.75, 1.43)        | 0.99 (0.68, 1.43) |
| <b>Income Quintile</b>                         |                          |                          |                          |                   |
| 1 (lowest)                                     | ref                      | ref                      | ref                      | ref               |
| 2                                              | 1.03 (0.92, 1.17)        | 1.11 (0.93, 1.33)        | 1.03 (0.83, 1.28)        | 0.96 (0.75, 1.24) |
| 3                                              | 1.09 (0.97, 1.22)        | 0.96 (0.8, 1.14)         | <b>1.31 (1.07, 1.61)</b> | 1.17 (0.91, 1.49) |
| 4                                              | <b>1.16 (1.03, 1.3)</b>  | 1.19 (1, 1.41)           | <b>1.27 (1.04, 1.55)</b> | 1.1 (0.87, 1.41)  |
| 5                                              | 1.09 (0.97, 1.22)        | 1.05 (0.89, 1.25)        | <b>1.25 (1.03, 1.53)</b> | 1.01 (0.79, 1.29) |
| <b>Immigrant Status</b>                        |                          |                          |                          |                   |
| Yes                                            | ref                      | ref                      | ref                      | ref               |
| No                                             | <b>1.24 (1.13, 1.36)</b> | <b>1.24 (1.09, 1.41)</b> | <b>1.34 (1.13, 1.59)</b> | 1.17 (0.93, 1.48) |
| <b>PHYSICIAN</b>                               |                          |                          |                          |                   |
| <b>Age</b>                                     | 0.99 (0.99, 1)           | 1 (0.99, 1)              | 0.99 (0.99, 1)           | 0.99 (0.99, 1)    |

|                                       |                   |                          |                   |                   |
|---------------------------------------|-------------------|--------------------------|-------------------|-------------------|
| <b>Gender</b>                         |                   |                          |                   |                   |
| Male                                  | ref               | ref                      | ref               | ref               |
| Female                                | 1 (0.91, 1.09)    | 0.97 (0.85, 1.11)        | 1 (0.85, 1.19)    | 1.12 (0.9, 1.38)  |
| <b>Canadian Graduate</b>              |                   |                          |                   |                   |
| No                                    | ref               | ref                      | ref               | ref               |
| Yes                                   | 1.09 (0.98, 1.2)  | 1.03 (0.88, 1.21)        | 1.11 (0.93, 1.33) | 1.18 (0.95, 1.47) |
| <b>Years in Practice</b>              | 1 (0.99, 1.01)    | 1.01 (0.99, 1.03)        | 0.99 (0.97, 1.01) | 1.02 (1, 1.04)    |
| <b>Roster Size</b>                    | 1 (1, 1)          | 1 (1, 1)                 | 1 (1, 1)          | 1 (1, 1)          |
|                                       |                   |                          |                   |                   |
| <b>PRACTICE</b>                       |                   |                          |                   |                   |
| <b>Group Size</b>                     | 1.01 (1, 1.02)    | 1.02 (1, 1.03)           | 1 (0.99, 1.02)    | 1.01 (0.99, 1.03) |
| <b>Number of after-hours services</b> | 1 (1, 1)          | 1 (1, 1)                 | 1 (1, 1)          | 1 (1, 1)          |
| <b>Practice Model</b>                 |                   |                          |                   |                   |
| Non-team                              | ref               | ref                      | ref               | ref               |
| Team                                  | 1.23 (0.99, 1.52) | <b>1.47 (1.13, 1.93)</b> | 1 (0.66, 1.51)    | 1.29 (0.78, 2.14) |

**Table 5c. Multivariate analysis – Wait Time for Care****Bold** = statistically significant, p<0.05, 95% CI

|                              | Total (RIO 0-39)<br>(patient n =<br>10,778) | RIO 0<br>(patient n = 4,642) | RIO 1-9<br>(patient n = 3,542) | RIO 10-39<br>(patient n = 2,594) |
|------------------------------|---------------------------------------------|------------------------------|--------------------------------|----------------------------------|
|                              | OR (CI)                                     | OR (CI)                      | OR (CI)                        | OR (CI)                          |
| <b>MAIN EXPOSURE</b>         |                                             |                              |                                |                                  |
| <b>Access Bonus Quintile</b> |                                             |                              |                                |                                  |
| 1 (lowest)                   | ref                                         | ref                          | ref                            | ref                              |
| 2                            | 1.01 (0.85, 1.2)                            | 1.11 (0.89, 1.37)            | 0.98 (0.73, 1.32)              | 0.65 (0.32, 1.3)                 |
| 3                            | 1.17 (0.97, 1.41)                           | <b>1.29 (1.02, 1.64)</b>     | 1.05 (0.75, 1.47)              | 1 (0.54, 1.83)                   |
| 4                            | <b>1.27 (1.05, 1.55)</b>                    | <b>1.32 (1.01, 1.72)</b>     | <b>1.66 (1.18, 2.35)</b>       | 1.3 (0.75, 2.25)                 |
| 5 (highest)                  | <b>1.63 (1.32, 2)</b>                       | <b>2 (1.46, 2.73)</b>        | <b>2.15 (1.46, 3.14)</b>       | 1.56 (0.93, 2.63)                |
| <b>ICC -practice</b>         | 4.87%                                       | 3.27%                        | 4.98%                          | 1.20%                            |
| <b>ICC -physician</b>        | 6.16%                                       | 4.77%                        | 4.96%                          | 12.35%                           |
|                              |                                             |                              |                                |                                  |
| <b>PATIENT</b>               |                                             |                              |                                |                                  |
| <b>Gender</b>                |                                             |                              |                                |                                  |
| Male                         | ref                                         | ref                          | ref                            | ref                              |
| Female                       | <b>1.12 (1.02, 1.23)</b>                    | 1.13 (0.98, 1.31)            | 1.18 (0.99, 1.4)               | 1.08 (0.87, 1.34)                |
| <b>Age</b>                   |                                             |                              |                                |                                  |
| <18                          | Ref                                         | ref                          | ref                            | ref                              |
| 19-34                        | <b>1.5 (1.01, 2.23)</b>                     | 1.6 (0.9, 2.84)              | 1.09 (0.55, 2.18)              | 2.35 (0.92, 5.98)                |
| 35-49                        | <b>1.48 (1.01, 2.18)</b>                    | 1.34 (0.76, 2.33)            | 1.49 (0.76, 2.94)              | 2.06 (0.83, 5.1)                 |
| 50-64                        | <b>1.5 (1.02, 2.19)</b>                     | 1.45 (0.83, 2.52)            | 1.37 (0.71, 2.66)              | 2.08 (0.85, 5.09)                |
| 65-74                        | <b>1.9 (1.3, 2.8)</b>                       | <b>1.87 (1.07, 3.28)</b>     | 1.49 (0.76, 2.92)              | <b>3.17 (1.28, 7.82)</b>         |
| 75+                          | <b>2.13 (1.44, 3.16)</b>                    | <b>2.03 (1.14, 3.6)</b>      | <b>2.28 (1.15, 4.53)</b>       | <b>2.56 (1.01, 6.48)</b>         |
| <b>Education</b>             |                                             |                              |                                |                                  |
| Some high school or less     | ref                                         | ref                          | ref                            | ref                              |
| High School                  | 0.99 (0.82, 1.19)                           | 0.94 (0.7, 1.27)             | 1.14 (0.81, 1.6)               | 0.88 (0.61, 1.27)                |

|                                                |                          |                   |                          |                   |
|------------------------------------------------|--------------------------|-------------------|--------------------------|-------------------|
| Some postsecondary                             | 0.85 (0.68, 1.06)        | 0.83 (0.59, 1.17) | 0.94 (0.64, 1.38)        | 0.79 (0.5, 1.25)  |
| College                                        | 0.94 (0.78, 1.14)        | 0.96 (0.72, 1.29) | 1.08 (0.77, 1.51)        | 0.76 (0.52, 1.1)  |
| University                                     | 0.87 (0.72, 1.06)        | 0.9 (0.67, 1.2)   | 0.93 (0.65, 1.32)        | 0.64 (0.43, 0.96) |
| Postgraduate                                   | 0.8 (0.65, 1)            | 0.81 (0.59, 1.1)  | 0.9 (0.6, 1.34)          | 0.65 (0.38, 1.11) |
| <b>Primary Language</b>                        |                          |                   |                          |                   |
| Other                                          | ref                      | ref               | ref                      | ref               |
| English, English and French, English and Other | 0.88 (0.71, 1.1)         | 0.88 (0.67, 1.17) | 1.21 (0.8, 1.84)         | 0.71 (0.27, 1.83) |
| French                                         | 0.68 (0.46, 1.01)        | 0.83 (0.48, 1.42) | 0.78 (0.36, 1.69)        | 0.58 (0.18, 1.92) |
| <b>Health Status</b>                           |                          |                   |                          |                   |
| Poor                                           | ref                      | ref               | ref                      | ref               |
| Fair                                           | 0.92 (0.72, 1.17)        | 0.85 (0.59, 1.22) | 0.8 (0.52, 1.23)         | 1.21 (0.74, 1.98) |
| Good                                           | 0.95 (0.76, 1.19)        | 0.89 (0.63, 1.25) | 0.91 (0.62, 1.35)        | 1.12 (0.71, 1.75) |
| Very good                                      | 1.16 (0.93, 1.44)        | 0.99 (0.71, 1.39) | 1.24 (0.84, 1.84)        | 1.29 (0.83, 2.02) |
| Excellent                                      | <b>1.3 (1.02, 1.65)</b>  | 1.18 (0.83, 1.7)  | 1.27 (0.83, 1.93)        | 1.38 (0.84, 2.29) |
| <b>Income Quintile</b>                         |                          |                   |                          |                   |
| 1 (lowest)                                     | ref                      | ref               | ref                      | ref               |
| 2                                              | 1.05 (0.89, 1.23)        | 1.04 (0.83, 1.31) | 1.13 (0.83, 1.54)        | 1.04 (0.72, 1.49) |
| 3                                              | 1.05 (0.9, 1.23)         | 0.96 (0.77, 1.21) | 1.3 (0.97, 1.76)         | 0.98 (0.68, 1.4)  |
| 4                                              | 1.14 (0.97, 1.33)        | 1.02 (0.81, 1.27) | 1.33 (1, 1.78)           | 1.31 (0.92, 1.85) |
| 5                                              | <b>1.17 (1.01, 1.37)</b> | 1.04 (0.83, 1.3)  | <b>1.54 (1.16, 2.05)</b> | 1.1 (0.76, 1.57)  |
| <b>Immigrant Status</b>                        |                          |                   |                          |                   |
| Yes                                            | ref                      | ref               | ref                      | ref               |
| No                                             | 1 (0.88, 1.13)           | 0.98 (0.83, 1.17) | 0.96 (0.76, 1.2)         | 1.33 (0.94, 1.89) |
| <b>PHYSICIAN</b>                               |                          |                   |                          |                   |
| <b>Age</b>                                     | 1 (1, 1.01)              | 1 (1, 1.01)       | 1.01 (1, 1.02)           | 1 (0.99, 1.02)    |

|                                       |                   |                   |                   |                   |
|---------------------------------------|-------------------|-------------------|-------------------|-------------------|
| <b>Gender</b>                         |                   |                   |                   |                   |
| Male                                  | ref               | ref               | ref               | ref               |
| Female                                | 0.92 (0.82, 1.03) | 0.88 (0.75, 1.03) | 0.94 (0.77, 1.16) | 0.95 (0.71, 1.26) |
| <b>Canadian Graduate</b>              |                   |                   |                   |                   |
| No                                    | ref               | ref               | ref               | ref               |
| Yes                                   | 1.07 (0.94, 1.21) | 0.93 (0.77, 1.12) | 1.03 (0.83, 1.27) | 1.37 (1.01, 1.85) |
| <b>Years in Practice</b>              | 0.98 (0.96, 1)    | 1.01 (0.98, 1.03) | 0.96 (0.93, 0.98) | 0.97 (0.93, 1)    |
| <b>Roster Size</b>                    | 1 (1, 1)          | 1 (1, 1)          | 1 (1, 1)          | 1 (1, 1)          |
|                                       |                   |                   |                   |                   |
| <b>PRACTICE</b>                       |                   |                   |                   |                   |
| <b>Group Size</b>                     | 0.99 (0.98, 1)    | 1 (0.99, 1.01)    | 0.98 (0.97, 0.99) | 0.99 (0.98, 1)    |
| <b>Number of after-hours services</b> | 1 (1, 1)          | 1 (1, 1)          | 1 (1, 1)          | 1 (1, 1)          |
| <b>Practice Model</b>                 |                   |                   |                   |                   |
| Non-team                              | ref               | ref               | ref               | ref               |
| Team                                  | 1.1 (0.94, 1.28)  | 1.13 (0.92, 1.38) | 1.27 (0.96, 1.69) | 0.96 (0.71, 1.31) |

**Table 5d. Multivariate analysis – Timeliness of Wait****Bold** = statistically significant,  $p < 0.05$ , 95% CI

|                              | Total (RIO 0-39)<br>(patient n =<br>10,778) | RIO 0<br>(patient n = 4,642) | RIO 1-9<br>(patient n = 3,542) | RIO 10-39<br>(patient n = 2,594) |
|------------------------------|---------------------------------------------|------------------------------|--------------------------------|----------------------------------|
|                              | OR (CI)                                     | OR (CI)                      | OR (CI)                        | OR (CI)                          |
| <b>MAIN EXPOSURE</b>         |                                             |                              |                                |                                  |
| <b>Access Bonus Quintile</b> |                                             |                              |                                |                                  |
| 1 (lowest)                   |                                             |                              |                                |                                  |
| 2                            | 1.29 (0.98, 1.69)                           | 1.13 (0.77, 1.68)            | 1.48 (0.85, 2.58)              | 0.87 (0.24, 3.08)                |
| 3                            | 1.29 (0.94, 1.77)                           | 0.96 (0.61, 1.52)            | <b>2.15 (1.16, 3.99)</b>       | 1.62 (0.48, 5.44)                |
| 4                            | <b>1.58 (1.16, 2.13)</b>                    | 1.39 (0.81, 2.36)            | <b>2.39 (1.32, 4.31)</b>       | 1.62 (0.58, 4.52)                |
| 5 (highest)                  | <b>1.98 (1.38, 2.82)</b>                    | <b>3.01 (1.42, 6.38)</b>     | <b>1.99 (1.01, 3.9)</b>        | 2.26 (0.83, 6.14)                |
| <b>ICC -practice</b>         |                                             |                              |                                |                                  |
|                              | 1.89%                                       | 3.61%                        | 1.30%                          | 0.98%                            |
| <b>ICC -physician</b>        |                                             |                              |                                |                                  |
|                              | 7.93%                                       | 6.64%                        | 9.95%                          | 15.61%                           |
| <b>PATIENT</b>               |                                             |                              |                                |                                  |
| <b>Gender</b>                |                                             |                              |                                |                                  |
| Male                         | ref                                         | ref                          | ref                            | ref                              |
| Female                       | 0.83 (0.7, 1)                               | 0.99 (0.74, 1.33)            | 0.7 (0.49, 0.98)               | 0.67 (0.37, 1.19)                |
| <b>Age</b>                   |                                             |                              |                                |                                  |
| <18                          | ref                                         | ref                          | ref                            | ref                              |
| 19-34                        | 0.44 (0.16, 1.24)                           | 0.41 (0.06, 2.65)            | 0.29 (0.04, 2.05)              | 1.1 (0.08, 15.61)                |
| 35-49                        | 0.48 (0.16, 1.4)                            | 0.41 (0.06, 2.77)            | 0.45 (0.06, 3.43)              | 0.79 (0.05, 12.52)               |
| 50-64                        | 0.58 (0.2, 1.66)                            | 0.66 (0.1, 4.38)             | 0.39 (0.06, 2.7)               | 0.96 (0.06, 14.32)               |
| 65-74                        | 1.08 (0.38, 3.06)                           | 0.99 (0.15, 6.54)            | 0.9 (0.13, 6.37)               | 1.85 (0.12, 27.32)               |
| 75+                          | 1.17 (0.42, 3.28)                           | 0.89 (0.13, 5.87)            | 0.98 (0.14, 6.97)              | 3.88 (0.28, 53.1)                |
| <b>Education</b>             |                                             |                              |                                |                                  |
| Some high school or less     | ref                                         | ref                          | ref                            | ref                              |
| High School                  | 1.36 (0.93, 1.97)                           | <b>1.85 (1.04, 3.28)</b>     | 1.15 (0.55, 2.39)              | 1.02 (0.37, 2.83)                |
| Some postsecondary           | 1.42 (0.91, 2.2)                            | 2.03 (0.96, 4.32)            | 1.17 (0.54, 2.51)              | 0.83 (0.23, 3.06)                |
| College                      | 1.11 (0.79, 1.57)                           | 1.57 (0.9, 2.71)             | 0.84 (0.42, 1.68)              | 1.03 (0.38, 2.78)                |
| University                   | 1.12 (0.79, 1.6)                            | 1.72 (0.99, 2.98)            | 0.78 (0.37, 1.63)              | 0.74 (0.27, 2.03)                |
| Postgraduate                 | 1.18 (0.77, 1.8)                            | 1.52 (0.83, 2.78)            | 0.95 (0.38, 2.38)              | 1.04 (0.28, 3.81)                |
| <b>Primary Language</b>      |                                             |                              |                                |                                  |
| Other                        | ref                                         | ref                          | ref                            | ref                              |

|                                                |                          |                          |                          |                   |
|------------------------------------------------|--------------------------|--------------------------|--------------------------|-------------------|
| English, English and French, English and Other | 1.41 (0.96, 2.08)        | 1.24 (0.72, 2.13)        | <b>2.68 (1.09, 6.61)</b> | 1.44 (0.1, 21.36) |
| French                                         | 1.3 (0.71, 2.4)          | 1.55 (0.45, 5.31)        | 2.5 (0.61, 10.26)        | 1.2 (0.07, 20.91) |
| <b>Health Status</b>                           |                          |                          |                          |                   |
| Poor                                           | ref                      | ref                      | ref                      | ref               |
| Fair                                           | 1 (0.66, 1.51)           | 1.29 (0.58, 2.89)        | 0.72 (0.34, 1.54)        | 1.01 (0.34, 3.05) |
| Good                                           | 1.39 (0.94, 2.05)        | 1.42 (0.66, 3.04)        | 1.32 (0.63, 2.8)         | 1.39 (0.42, 4.61) |
| Very good                                      | 1.48 (0.99, 2.22)        | 1.81 (0.83, 3.94)        | 1.36 (0.67, 2.76)        | 1.11 (0.35, 3.55) |
| Excellent                                      | <b>2.02 (1.31, 3.1)</b>  | 1.79 (0.82, 3.91)        | <b>2.39 (1.05, 5.46)</b> | 2.57 (0.67, 9.82) |
| <b>Income Quintile</b>                         |                          |                          |                          |                   |
| 1 (lowest)                                     | ref                      | ref                      | ref                      | ref               |
| 2                                              | 0.99 (0.71, 1.37)        | 0.95 (0.54, 1.67)        | 1.15 (0.64, 2.09)        | 1.09 (0.46, 2.58) |
| 3                                              | 1.23 (0.91, 1.66)        | 0.86 (0.55, 1.36)        | <b>2 (1.04, 3.83)</b>    | 1.87 (0.75, 4.65) |
| 4                                              | 0.99 (0.76, 1.29)        | 0.99 (0.66, 1.49)        | 1.31 (0.77, 2.21)        | 0.8 (0.34, 1.89)  |
| 5                                              | 0.97 (0.74, 1.26)        | 0.89 (0.58, 1.38)        | 1.07 (0.6, 1.91)         | 1.13 (0.51, 2.49) |
| <b>Immigrant Status</b>                        |                          |                          |                          |                   |
| Yes                                            | ref                      | ref                      | ref                      | ref               |
| No                                             | 1.15 (0.9, 1.47)         | <b>1.45 (1.03, 2.02)</b> | 0.68 (0.38, 1.2)         | 1.63 (0.74, 3.62) |
|                                                |                          |                          |                          |                   |
| <b>PHYSICIAN</b>                               |                          |                          |                          |                   |
| <b>Age</b>                                     | 1.01 (1, 1.02)           | 1.01 (0.99, 1.02)        | 1.01 (0.99, 1.03)        | 1.03 (1, 1.06)    |
| <b>Gender</b>                                  |                          |                          |                          |                   |
| Male                                           | ref                      | ref                      | ref                      | ref               |
| Female                                         | 1.03 (0.84, 1.25)        | 0.89 (0.66, 1.21)        | <b>1.57 (1.04, 2.37)</b> | 0.69 (0.35, 1.35) |
| <b>Canadian Graduate</b>                       |                          |                          |                          |                   |
| No                                             | ref                      | ref                      | ref                      | ref               |
| Yes                                            | 1.05 (0.85, 1.31)        | 0.94 (0.66, 1.33)        | 1.28 (0.83, 1.98)        | 0.87 (0.44, 1.74) |
| <b>Years in Practice</b>                       | 0.98 (0.95, 1.01)        | 0.99 (0.94, 1.05)        | 0.99 (0.94, 1.05)        | 0.95 (0.89, 1.02) |
| <b>Roster Size</b>                             | 1 (1, 1)                 | 1 (1, 1)                 | 1 (1, 1)                 | 1 (0.99, 1)       |
|                                                |                          |                          |                          |                   |
| <b>PRACTICE</b>                                |                          |                          |                          |                   |
| <b>Group Size</b>                              | 0.99 (0.98, 1)           | 0.99 (0.98, 1.01)        | 0.98 (0.96, 0.99)        | 0.99 (0.97, 1.01) |
| <b>Number of after-hours services</b>          | 1 (1, 1)                 | 1 (1, 1)                 | 1 (1, 1)                 | 1 (1, 1)          |
| <b>Practice Model</b>                          |                          |                          |                          |                   |
| Non-team                                       | ref                      | ref                      | ref                      | ref               |
| Team                                           | <b>1.27 (1.02, 1.59)</b> | 1.29 (0.89, 1.87)        | 1.4 (0.9, 2.19)          | 1.19 (0.65, 2.18) |
